# Supplementary material
Source: PubMed Central journal article supplement (PMC6336507)
Supplement: NIHMS987816-supplement-Supp_legend1.pdf [file NIHMS987816-supplement-Supp_legend1.pdf]

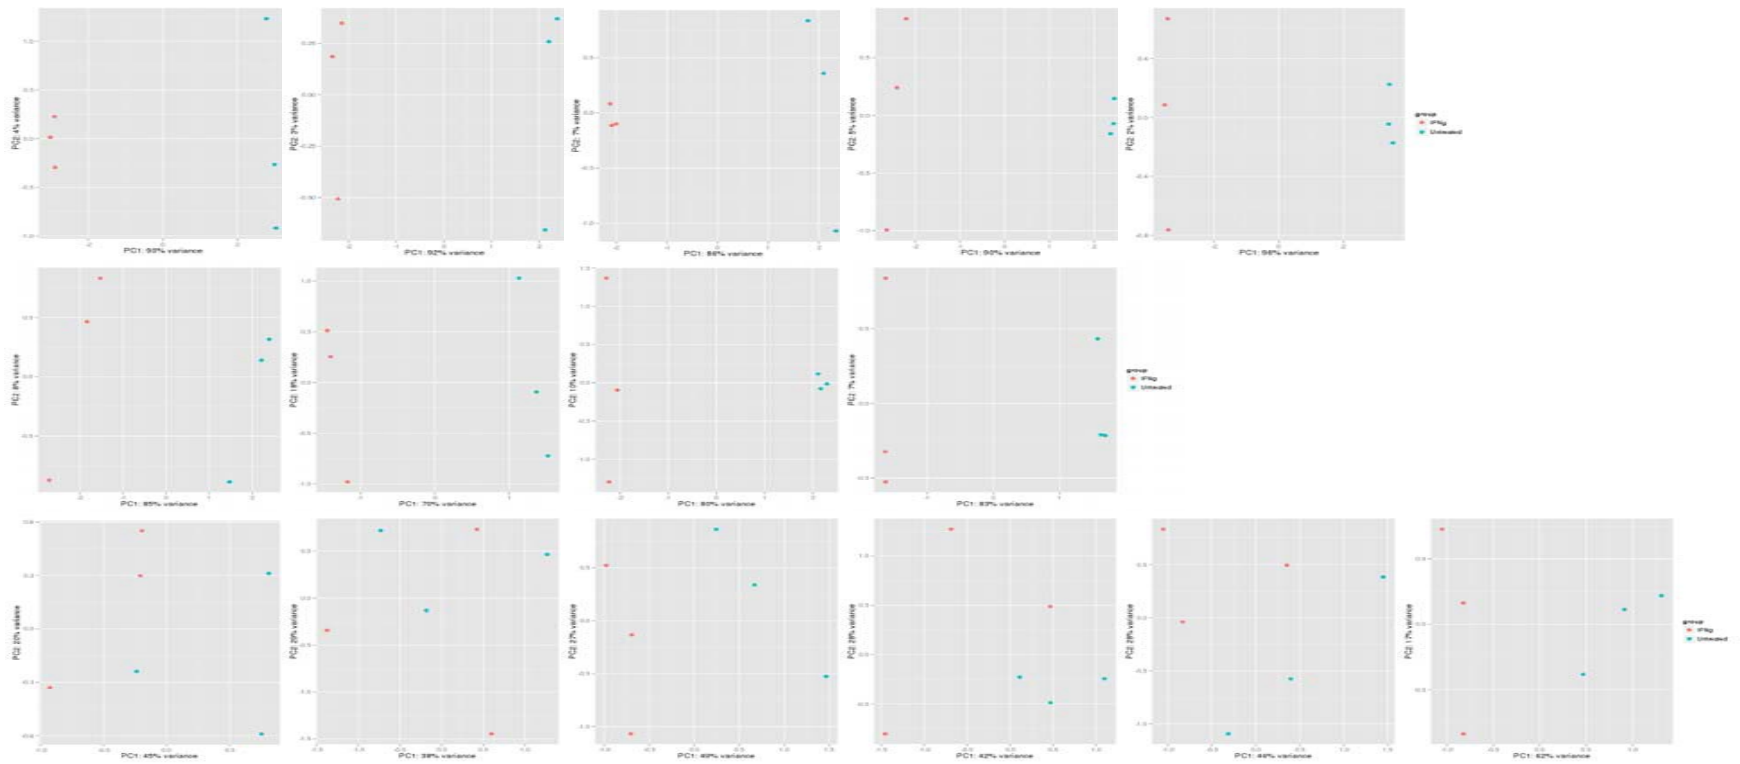

**Supplementary Figure 1.** Plots of principal component 1 (PC1) against principal component 2 (PC2) based on normalized read counts from each subject of normal control group (C1-5 from left to right, top row), CGD patients (D1-4 from left to right, middle row) and of IFNGRD patients (N1-6 from left to right, bottom row) analyzed as different RNA seq datasets. There is distinct separation of IFN- $\gamma$  treated versus untreated samples of all normal control and CGD patients however the majority of IFNGRD patients do not form distinct groups between IFN- $\gamma$  treated and untreated samples.
