# Supplementary material
Source: PubMed Central journal article supplement (PMC6336507)
Supplement: NIHMS987816-supplement-Supp_legend2.pdf [file NIHMS987816-supplement-Supp_legend2.pdf]

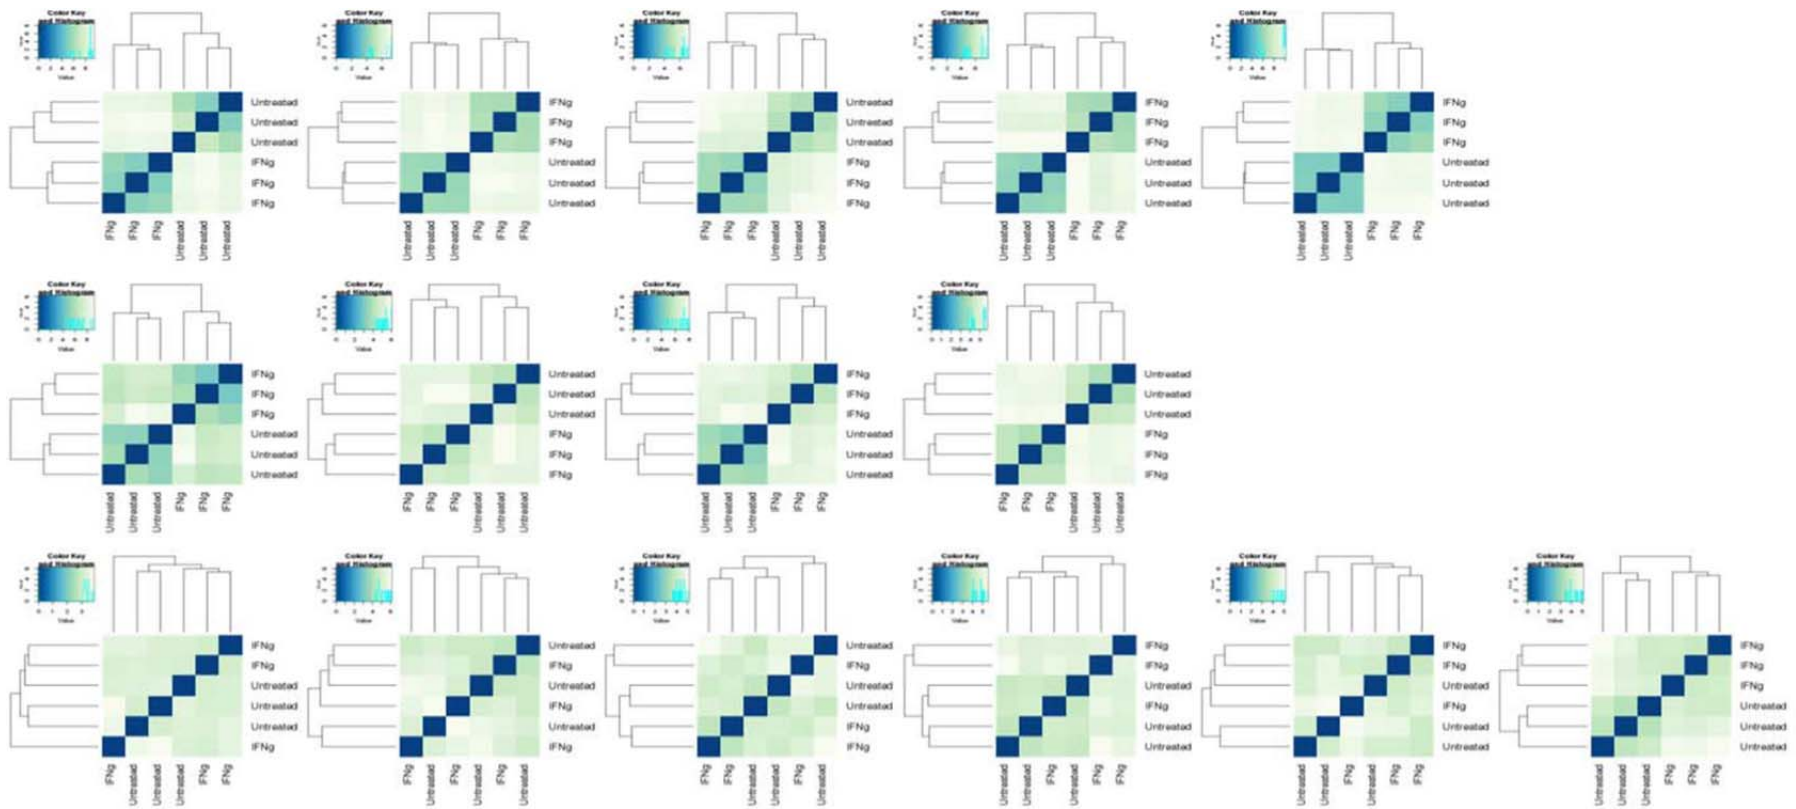

**Supplementary Figure 2: Sample to sample distances plots of each subject of normal control group (C1-5 from left to right, top row), CGD patients (D1-4 from left to right, middle row) and of IFNGRD patients (N1-6 from left to right, bottom row). Heatmap showing the Euclidean distances between the samples as calculated from the regularized log transformation reveals that there a distinct separation of IFN- $\gamma$  treated versus untreated samples of all normal control and CGD patients however the majority of IFNGRD patients do not form distinct groups between IFN- $\gamma$  treated and untreated samples.**
