# Supplementary material
Source: PubMed Central journal article supplement (PMC6336507)
Supplement: NIHMS987816-supplement-Supp_TableS1.pdf [file NIHMS987816-supplement-Supp_TableS1.pdf]

**Supplemental Table 1** – Up-regulated genes with highest fold change and p-value <0.05 upon IFN- $\gamma$  treatment *in vitro*

| Ensembl ID      | Ensembl Name | Base Mean | log2 Fold Change | pvalue    | Padj      |
|-----------------|--------------|-----------|------------------|-----------|-----------|
| <b>C1</b>       |              |           |                  |           |           |
| ENSG00000140511 | HAPLN3       | 3,03E+14  | 2,27E+14         | 2,59E-127 | 3,39E-124 |
| ENSG00000154451 | GBP5         | 3,82E+14  | 2,23E+14         | 1,83E-140 | 2,67E-137 |
| ENSG00000162645 | GBP2         | 1,07E+14  | 2,09E+14         | 6,29E-243 | 1,65E-239 |
| ENSG00000162654 | GBP4         | 1,27E+14  | 2,05E+14         | 4,99E-265 | 1,64E-262 |
| ENSG00000138755 | CXCL9        | 3,58E+14  | 2,00E+14         | 3,01E-105 | 3,59E-103 |
| ENSG00000117228 | GBP1         | 1,45E+14  | 2,00E+14         | 6,67E-279 | 2,92E-275 |
| ENSG00000140105 | WARS         | 1,35E+14  | 1,95E+14         | 0,00E+00  | 0,00E+00  |
| ENSG00000221963 | APOL6        | 2,85E+14  | 1,76E+14         | 0,00E+00  | 0,00E+00  |
| ENSG00000125347 | IRF1         | 2,89E+14  | 1,48E+14         | 3,04E-240 | 6,64E-237 |
| ENSG00000169245 | CXCL10       | 3,02E+14  | 1,22E+14         | 1,06E-33  | 5,79E-31  |
| <b>C2</b>       |              |           |                  |           |           |
| ENSG00000140511 | HAPLN3       | 3,23E+14  | 2,03E+14         | 4,49E-131 | 7,18E-128 |
| ENSG00000162654 | GBP4         | 1,06E+13  | 1,83E+14         | 2,20E-226 | 1,06E-223 |
| ENSG00000154451 | GBP5         | 3,71E+14  | 1,78E+14         | 2,75E-107 | 2,64E-105 |
| ENSG00000162645 | GBP2         | 1,46E+14  | 1,33E+14         | 1,38E-159 | 3,31E-156 |
| ENSG00000117228 | GBP1         | 1,29E+14  | 1,23E+14         | 3,14E-121 | 4,31E-118 |
| ENSG00000125347 | IRF1         | 1,98E+14  | 1,09E+14         | 1,67E-131 | 3,22E-128 |
| ENSG00000100628 | ASB2         | 6,16E+14  | 1,02E+14         | 7,94E-44  | 5,87E-41  |
| ENSG00000140105 | WARS         | 8,63E+14  | 1,46E+13         | 0,00E+00  | 0,00E+00  |

|                 |        |          |          |           |           |
|-----------------|--------|----------|----------|-----------|-----------|
| ENSG00000221963 | APOL6  | 1,86E+14 | 1,06E+13 | 1,47E-110 | 1,76E-107 |
| ENSG00000115415 | STAT1  | 1,46E+14 | 7,98E-01 | 2,25E-215 | 7,20E-212 |
| <b>C3</b>       |        |          |          |           |           |
| ENSG00000117228 | GBP1   | 1,71E+14 | 1,52E+14 | 2,22E-214 | 5,78E-211 |
| ENSG00000221963 | APOL6  | 3,37E+14 | 1,47E+14 | 0,00E+00  | 0,00E+00  |
| ENSG00000140105 | WARS   | 8,22E+14 | 1,42E+14 | 0,00E+00  | 0,00E+00  |
| ENSG00000162645 | GBP2   | 1,26E+14 | 1,32E+14 | 8,35E-137 | 1,30E-133 |
| ENSG00000154451 | GBP5   | 4,99E+14 | 1,19E+14 | 5,74E-59  | 4,48E-56  |
| ENSG00000125347 | IRF1   | 2,92E+14 | 1,17E+14 | 6,33E-187 | 1,24E-183 |
| ENSG00000162654 | GBP4   | 1,94E+14 | 1,06E+14 | 2,07E-126 | 2,70E-121 |
| ENSG00000163568 | AIM2   | 5,04E+14 | 1,00E+00 | 1,18E-40  | 7,07E-38  |
| ENSG00000168394 | TAP1   | 6,92E+14 | 8,42E-01 | 8,36E-116 | 9,33E-113 |
| ENSG00000085449 | WDFY1  | 1,65E+14 | 7,89E-01 | 9,03E-57  | 6,41E-54  |
| <b>C4</b>       |        |          |          |           |           |
| ENSG00000117228 | GBP1   | 1,02E+14 | 1,74E+14 | 2,58E-199 | 4,05E-196 |
| ENSG00000140511 | HAPLN3 | 1,82E+14 | 1,61E+14 | 1,53E-70  | 1,20E-67  |
| ENSG00000162654 | GBP4   | 1,63E+13 | 1,51E+14 | 3,96E-225 | 1,25E-221 |
| ENSG00000221963 | APOL6  | 1,62E+14 | 1,46E+14 | 6,71E-206 | 1,27E-202 |
| ENSG00000125347 | IRF1   | 2,12E+14 | 1,35E+14 | 5,75E-198 | 7,75E-195 |
| ENSG00000154451 | GBP5   | 1,69E+14 | 1,26E+14 | 1,32E-38  | 5,94E-36  |
| ENSG00000168394 | TAP1   | 4,88E+14 | 1,07E+14 | 7,13E-190 | 8,41E-186 |
| ENSG00000115415 | STAT1  | 1,07E+14 | 1,05E+14 | 0,00E+00  | 0,00E+00  |
| ENSG00000138496 | PARP9  | 1,46E+14 | 1,01E+14 | 3,56E-90  | 3,73E-87  |
| ENSG00000140105 | WARS   | 8,71E+14 | 1,84E+13 | 0,00E+00  | 0,00E+00  |
| <b>C5</b>       |        |          |          |           |           |
| ENSG00000140511 | HAPLN3 | 2,51E+14 | 3,04E+14 | 1,49E-176 | 1,98E-173 |
| ENSG00000162654 | GBP4   | 8,37E+14 | 2,91E+14 | 0,00E+00  | 0,00E+00  |
| ENSG00000117228 | GBP1   | 5,78E+14 | 2,78E+14 | 1,13E-254 | 1,69E-250 |

|                 |          |          |          |           |           |
|-----------------|----------|----------|----------|-----------|-----------|
| ENSG00000138755 | CXCL9    | 1,96E+14 | 2,21E+14 | 4,36E-88  | 3,07E-85  |
| ENSG00000140105 | WARS     | 1,26E+14 | 2,12E+14 | 0,00E+00  | 0,00E+00  |
| ENSG00000221963 | APOL6    | 1,64E+14 | 2,12E+14 | 0,00E+00  | 0,00E+00  |
| ENSG00000154451 | GBP5     | 1,71E+13 | 2,08E+14 | 3,99E-75  | 2,52E-74  |
| ENSG00000163568 | AIM2     | 2,85E+14 | 1,79E+14 | 1,24E-67  | 6,46E-65  |
| ENSG00000131142 | CCL25    | 1,43E+14 | 1,60E+14 | 5,19E-37  | 1,89E-34  |
| ENSG00000115415 | STAT1    | 1,18E+14 | 1,56E+14 | 0,00E+00  | 0,00E+00  |
| <b>D1</b>       |          |          |          |           |           |
| ENSG00000169245 | CXCL10   | 3,33E+14 | 1,40E+14 | 6,34E-58  | 8,15E-55  |
| ENSG00000140105 | WARS     | 8,13E+14 | 1,31E+14 | 3,87E-239 | 2,98E-235 |
| ENSG00000162654 | GBP4     | 1,18E+14 | 1,23E+14 | 2,31E-103 | 8,92E-100 |
| ENSG00000221963 | APOL6    | 1,74E+14 | 9,60E-01 | 2,83E-79  | 7,28E-76  |
| ENSG00000125347 | IRF1     | 1,75E+14 | 9,29E-01 | 2,23E-58  | 3,43E-55  |
| ENSG00000117228 | GBP1     | 1,44E+14 | 8,73E-01 | 3,05E-53  | 3,36E-50  |
| ENSG00000162645 | GBP2     | 2,19E+14 | 7,62E-01 | 1,20E-41  | 1,16E-39  |
| ENSG00000168394 | TAP1     | 6,01E+14 | 7,26E-01 | 3,75E-73  | 7,23E-70  |
| ENSG00000240065 | PSMB9    | 1,81E+13 | 6,38E-01 | 4,04E-25  | 3,11E-22  |
| ENSG00000025708 | TYMP     | 4,35E+14 | 6,17E-01 | 4,74E-04  | 1,46E-01  |
| <b>D2</b>       |          |          |          |           |           |
| ENSG00000162654 | GBP4     | 8,22E+14 | 8,95E-01 | 3,60E-44  | 9,87E-41  |
| ENSG00000154451 | GBP5     | 6,44E+14 | 8,81E-01 | 3,92E-41  | 8,59E-36  |
| ENSG00000117228 | GBP1     | 1,60E+14 | 8,29E-01 | 6,43E-55  | 2,35E-51  |
| ENSG00000140105 | WARS     | 1,23E+14 | 7,71E-01 | 1,51E-118 | 1,66E-114 |
| ENSG00000221963 | APOL6    | 2,67E+14 | 7,67E-01 | 7,42E-65  | 4,06E-61  |
| ENSG00000140511 | HAPLN3   | 2,06E+14 | 7,48E-01 | 5,30E-14  | 5,28E-11  |
| ENSG00000162645 | GBP2     | 1,64E+14 | 7,11E-01 | 4,84E-35  | 7,57E-32  |
| ENSG00000125347 | IRF1     | 2,42E+14 | 6,29E-01 | 2,80E-38  | 5,12E-35  |
| ENSG00000108679 | LGALS3BP | 1,31E+14 | 6,06E-01 | 3,46E-05  | 2,70E-02  |

|                 |          |          |          |           |           |
|-----------------|----------|----------|----------|-----------|-----------|
| ENSG00000168394 | TAP1     | 6,51E+14 | 4,92E-01 | 1,98E-30  | 2,41E-27  |
| <b>D3</b>       |          |          |          |           |           |
| ENSG00000140511 | HAPLN3   | 2,45E+14 | 1,84E+14 | 1,27E-103 | 1,99E-100 |
| ENSG00000154451 | GBP5     | 1,18E+14 | 1,47E+14 | 8,16E-149 | 2,04E-145 |
| ENSG00000138755 | CXCL9    | 1,02E+13 | 1,46E+14 | 2,06E-60  | 2,34E-58  |
| ENSG00000117228 | GBP1     | 1,36E+14 | 1,43E+14 | 7,08E-138 | 1,48E-134 |
| ENSG00000140105 | WARS     | 1,22E+14 | 1,37E+14 | 0,00E+00  | 0,00E+00  |
| ENSG00000221963 | APOL6    | 2,91E+13 | 1,29E+14 | 3,15E-177 | 1,97E-173 |
| ENSG00000125347 | IRF1     | 2,53E+14 | 1,21E+14 | 1,42E-164 | 5,95E-161 |
| ENSG00000162645 | GBP2     | 1,98E+14 | 1,12E+14 | 3,93E-102 | 5,47E-99  |
| ENSG00000169245 | CXCL10   | 1,22E+14 | 1,03E+14 | 5,52E-23  | 4,32E-21  |
| ENSG00000162654 | GBP4     | 1,59E+14 | 1,36E+13 | 4,22E-158 | 1,32E-154 |
| <b>D4</b>       |          |          |          |           |           |
| ENSG00000162654 | GBP4     | 5,89E+14 | 1,43E+14 | 9,20E-118 | 1,80E-114 |
| ENSG00000140105 | WARS     | 1,11E+14 | 1,17E+14 | 0,00E+00  | 0,00E+00  |
| ENSG00000125347 | IRF1     | 1,47E+14 | 1,00E+14 | 1,24E-97  | 1,94E-94  |
| ENSG00000221963 | APOL6    | 1,69E+14 | 8,87E-01 | 1,91E-77  | 2,49E-74  |
| ENSG00000117228 | GBP1     | 1,17E+14 | 8,42E-01 | 8,47E-53  | 8,30E-50  |
| ENSG00000168394 | TAP1     | 4,89E+14 | 7,87E-01 | 8,43E-133 | 2,20E-129 |
| ENSG00000162645 | GBP2     | 1,32E+13 | 7,69E-01 | 1,83E-48  | 1,60E-45  |
| ENSG00000115415 | STAT1    | 1,24E+14 | 6,68E-01 | 2,94E-143 | 1,15E-139 |
| ENSG00000004468 | CD38     | 3,18E+14 | 6,46E-01 | 1,97E-09  | 6,45E-07  |
| ENSG00000085449 | WDFY1    | 1,43E+14 | 5,80E-01 | 1,39E-22  | 7,76E-20  |
| <b>N1</b>       |          |          |          |           |           |
| ENSG00000274267 | HIST1H3B | 8,94E+14 | 1,37E-01 | 1,18E+06  | 3,84E+09  |
| ENSG00000273983 | HIST1H3G | 6,38E+14 | 1,42E-01 | 9,78E+05  | 1,59E-04  |
| ENSG00000277775 | HIST1H3F | 7,31E+14 | 1,30E-01 | 2,00E+08  | 2,18E-03  |
| ENSG00000278272 | HIST1H3C | 4,15E+14 | 1,35E-01 | 8,52E+08  | 6,94E-03  |

|                 |              |          |          |          |          |
|-----------------|--------------|----------|----------|----------|----------|
| ENSG00000213741 | RPS29        | 7,77E+14 | 1,18E-01 | 3,36E+09 | 2,19E-02 |
| ENSG00000167526 | RPL13        | 1,53E+14 | 1,07E-01 | 6,28E+09 | 3,41E-02 |
| ENSG00000278828 | HIST1H3H     | 6,98E+14 | 1,04E-01 | 1,69E-04 | 6,11E-02 |
| ENSG00000051523 | CYBA         | 2,23E+14 | 1,24E-01 | 2,06E-04 | 6,72E-02 |
| ENSG00000197409 | HIST1H3D     | 4,07E+14 | 1,05E-01 | 2,67E-04 | 7,24E-02 |
| <b>N2</b>       |              |          |          |          |          |
| 0 genes         |              |          |          |          |          |
| <b>N3</b>       |              |          |          |          |          |
| ENSG00000256618 | MTRNR2L1     | 8,68E+14 | 1,62E-01 | 8,04E+07 | 2,62E-04 |
| ENSG00000202058 | RN7SKP80     | 4,28E+14 | 1,61E-01 | 6,95E+09 | 8,71E-03 |
| ENSG00000211677 | IGLC2        | 3,57E+14 | 1,58E-01 | 1,23E-04 | 1,39E-02 |
| ENSG00000128016 | ZFP36        | 1,97E+14 | 1,50E-01 | 4,85E-04 | 2,87E-02 |
| ENSG00000090104 | RGS1         | 4,20E+14 | 1,46E-01 | 1,75E-04 | 1,68E-02 |
| ENSG00000133275 | CSNK1G2      | 1,14E+13 | 1,43E-01 | 1,53E-03 | 6,31E-02 |
| ENSG00000255823 | MTRNR2L8     | 1,44E+14 | 1,39E-01 | 4,75E+09 | 6,19E-03 |
| ENSG00000051523 | CYBA         | 2,73E+13 | 1,36E-01 | 4,34E-04 | 2,74E-02 |
| ENSG00000168264 | IRF2BP2      | 2,87E+14 | 1,34E-01 | 2,73E-04 | 2,34E-02 |
| ENSG00000253522 | CTC-231O11.1 | 1,82E+14 | 1,32E-01 | 1,45E-03 | 6,31E-02 |
| <b>N4</b>       |              |          |          |          |          |
| ENSG00000197409 | HIST1H3D     | 4,15E+14 | 1,77E-01 | 7,09E+08 | 3,48E-02 |
| ENSG00000275379 | HIST1H3I     | 1,71E+13 | 1,90E-01 | 2,60E+08 | 5,14E-02 |
| ENSG00000278828 | HIST1H3H     | 5,40E+14 | 1,56E-01 | 5,56E+09 | 6,81E-02 |
| ENSG00000277775 | HIST1H3F     | 5,29E+14 | 1,44E-01 | 9,06E+09 | 7,41E-02 |
| ENSG00000276903 | HIST1H2AL    | 2,22E+14 | 1,70E-01 | 1,16E-04 | 8,16E-02 |
| <b>N5</b>       |              |          |          |          |          |
| ENSG00000129003 | VPS13C       | 4,43E+14 | 1,76E-01 | 2,72E+08 | 3,99E-03 |
| ENSG00000138398 | PPIG         | 1,40E+14 | 1,94E-01 | 9,99E+07 | 1,06E-02 |
| ENSG00000100342 | APOL1        | 8,37E+14 | 1,83E-01 | 6,80E+09 | 4,33E-02 |

|                 |                 |          |          |          |          |
|-----------------|-----------------|----------|----------|----------|----------|
| ENSG00000107581 | EIF3A           | 5,80E+14 | 1,36E-01 | 1,25E-04 | 5,97E-02 |
| ENSG00000117500 | TMED5           | 2,24E+14 | 1,45E-01 | 1,43E-04 | 5,97E-02 |
| ENSG00000122257 | RBBP6           | 2,07E+14 | 1,51E-01 | 1,25E-04 | 5,97E-02 |
| ENSG00000139116 | KIF21A          | 8,81E+14 | 1,73E-01 | 1,39E-04 | 5,97E-02 |
| ENSG00000135535 | CD164           | 5,05E+14 | 1,44E-01 | 1,62E-04 | 6,06E-02 |
| ENSG00000100836 | PABPN1          | 7,42E+14 | 1,73E-01 | 2,29E-04 | 7,18E-02 |
| <b>N6</b>       |                 |          |          |          |          |
| ENSG00000233762 | AC007969.5      | 9,82E+14 | 2,50E-01 | 2,96E+07 | 5,64E+09 |
| ENSG00000200795 | RNU4-1          | 1,03E+14 | 2,39E-01 | 2,98E+09 | 1,80E-03 |
| ENSG00000212232 | SNORD17         | 3,81E+14 | 2,23E-01 | 6,03E+02 | 5,93E+06 |
| ENSG00000275379 | <u>HIST1H3I</u> | 1,44E+14 | 2,21E-01 | 1,05E+08 | 1,31E-04 |
| ENSG00000197409 | HIST1H3D        | 3,73E+14 | 2,17E-01 | 7,27E+03 | 5,93E+06 |
| ENSG00000252010 | SCARNA5         | 1,33E+13 | 2,08E-01 | 1,25E+09 | 1,10E-03 |
| ENSG00000255633 | MTRNR2L9        | 1,19E+14 | 2,05E-01 | 6,72E-02 | 2,19E+02 |
| ENSG00000227097 | RPS28P7         | 2,76E+14 | 2,05E-01 | 5,96E+05 | 1,94E+09 |
| ENSG00000108107 | RPL28           | 4,40E+14 | 1,97E-01 | 6,42E+05 | 4,19E+08 |
| ENSG00000270672 | MTRNR2L6        | 5,78E+14 | 1,91E-01 | 2,17E-04 | 8,61E-03 |
