# Supplementary material
Source: PubMed Central journal article supplement (PMC6336507)
Supplement: NIHMS987816-supplement-Supp_TableS2.pdf [file NIHMS987816-supplement-Supp_TableS2.pdf]

**Supplemental Table 2** – Down-regulated genes with highest fold change and p-value <0.05 upon IFN- $\gamma$  treatment *in vitro*

| Ensembl ID      | Ensembl Name | Base Mean | log2 Fold Change | pvalue   | padj     |
|-----------------|--------------|-----------|------------------|----------|----------|
| <b>C1</b>       |              |           |                  |          |          |
| ENSG00000117322 | CR2          | 1,67E+14  | -8,13E-01        | 2,81E-51 | 1,75E-48 |
| ENSG00000188404 | SELL         | 4,81E+14  | -6,85E-01        | 1,05E-07 | 2,65E-06 |
| ENSG00000166927 | MS4A7        | 9,88E+14  | -6,60E-01        | 1,61E+03 | 1,95E+05 |
| ENSG00000156738 | MS4A1        | 1,18E+14  | -6,37E-01        | 1,24E-58 | 1,02E-55 |
| ENSG00000122877 | EGR2         | 6,30E+14  | -6,04E-01        | 3,10E-06 | 7,39E-04 |
| ENSG00000143297 | FCRL5        | 8,30E+14  | -5,69E-01        | 6,11E-06 | 1,38E-03 |
| ENSG00000203710 | CR1          | 2,96E+14  | -5,63E-01        | 8,00E+02 | 9,99E+04 |
| ENSG00000277632 | CCL3         | 1,24E+14  | -5,45E-01        | 5,75E-09 | 1,57E-06 |
| ENSG00000226979 | LTA          | 8,25E+13  | -5,04E-01        | 1,16E-01 | 2,06E+01 |
| ENSG00000118515 | SGK1         | 2,02E+13  | -5,01E-01        | 2,22E+06 | 1,74E+08 |
| <b>C2</b>       |              |           |                  |          |          |
| ENSG00000188404 | SELL         | 9,83E+14  | -9,85E-01        | 2,35E-58 | 1,88E-54 |
| ENSG00000166927 | MS4A7        | 2,70E+14  | -5,97E-01        | 4,97E+00 | 7,77E+02 |
| ENSG00000137959 | IFI44L       | 3,12E+14  | -5,86E-01        | 4,67E-07 | 1,15E-04 |
| ENSG00000154262 | ABCA6        | 6,44E+14  | -5,82E-01        | 2,55E-05 | 5,71E-03 |
| ENSG00000137965 | IFI44        | 4,54E+14  | -5,04E-01        | 1,48E+02 | 1,90E+04 |
| ENSG00000124772 | CPNE5        | 6,47E+14  | -4,94E-01        | 8,53E-01 | 1,44E+01 |
| ENSG00000115604 | IL18R1       | 5,49E+14  | -4,90E-01        | 9,11E+00 | 1,35E+03 |
| ENSG00000138756 | BMP2K        | 6,64E+14  | -4,77E-01        | 5,96E+01 | 7,85E+03 |
| ENSG00000111335 | OAS2         | 2,46E+13  | -4,50E-01        | 2,15E-17 | 7,66E-15 |
| ENSG00000134061 | CD180        | 2,21E+14  | -4,48E-01        | 2,81E+05 | 1,73E+08 |
| <b>C3</b>       |              |           |                  |          |          |
| ENSG00000226979 | LTA          | 1,14E+14  | -5,43E-01        | 9,22E-13 | 2,88E-10 |
| ENSG00000143297 | FCRL5        | 2,41E+14  | -5,08E-01        | 2,04E-22 | 8,38E-22 |

|                 |         |          |           |          |          |
|-----------------|---------|----------|-----------|----------|----------|
| ENSG00000154262 | ABCA6   | 9,72E+14 | -3,93E-01 | 7,61E+00 | 1,01E+02 |
| ENSG00000163683 | C4orf34 | 2,41E+14 | -3,77E-01 | 6,12E-05 | 1,19E-02 |
| ENSG00000134061 | CD180   | 3,96E+12 | -3,52E-01 | 2,23E+07 | 1,55E+09 |
| ENSG00000003249 | DBNDD1  | 6,56E+14 | -3,50E-01 | 6,95E+05 | 5,96E+07 |
| ENSG00000112137 | PHACTR1 | 1,03E+12 | -3,41E-01 | 2,39E+04 | 2,36E+06 |
| ENSG00000118308 | LRMP    | 3,68E+14 | -3,40E-01 | 2,19E-09 | 5,35E-07 |
| ENSG00000188404 | SELL    | 1,41E+14 | -3,40E-01 | 2,70E+00 | 3,52E+03 |
| ENSG00000203710 | CR1     | 1,06E+14 | -3,01E-01 | 5,55E+05 | 4,87E+07 |
| <b>C4</b>       |         |          |           |          |          |
| ENSG00000188404 | SELL    | 4,80E+14 | -6,80E-01 | 6,43E-10 | 1,44E-07 |
| ENSG00000156738 | MS4A1   | 1,07E+14 | -4,93E-01 | 4,17E-48 | 2,46E-45 |
| ENSG00000143297 | FCRL5   | 3,43E+14 | -4,50E-01 | 1,70E+05 | 1,62E+07 |
| ENSG00000277632 | CCL3    | 1,28E+14 | -4,43E-01 | 4,27E-05 | 8,38E-03 |
| ENSG00000122877 | EGR2    | 3,94E+14 | -4,30E-01 | 1,09E+05 | 1,06E+07 |
| ENSG00000275302 | CCL4    | 1,84E+14 | -4,10E-01 | 4,10E+07 | 2,58E+09 |
| ENSG00000150938 | CRIM1   | 2,09E+14 | -3,92E-01 | 1,00E+08 | 5,91E+09 |
| ENSG00000154262 | ABCA6   | 6,58E+14 | -3,78E-01 | 3,07E+05 | 2,81E+07 |
| ENSG00000134762 | DSC3    | 4,26E+14 | -3,67E-01 | 9,16E+06 | 6,70E+08 |
| ENSG00000008853 | RHOBTB2 | 2,65E+14 | -3,58E-01 | 3,61E+08 | 1,85E-04 |
| <b>C5</b>       |         |          |           |          |          |
| ENSG00000143184 | XCL1    | 1,44E+14 | -8,14E-01 | 9,78E-01 | 9,22E+00 |
| ENSG00000117322 | CR2     | 2,08E+14 | -7,91E-01 | 1,29E-55 | 5,93E-53 |
| ENSG00000101197 | BIRC7   | 9,15E+14 | -7,35E-01 | 2,66E+03 | 1,79E+05 |
| ENSG00000203710 | CR1     | 5,28E+14 | -6,86E-01 | 2,77E-08 | 4,00E-06 |
| ENSG00000116741 | RGS2    | 2,00E+14 | -6,53E-01 | 1,68E+03 | 1,18E+04 |
| ENSG00000143297 | FCRL5   | 2,77E+14 | -6,15E-01 | 2,21E+00 | 1,77E+03 |
| ENSG00000185585 | OLFML2A | 1,36E+14 | -6,04E-01 | 4,61E+05 | 2,30E+07 |
| ENSG00000084710 | EFR3B   | 9,82E+14 | -6,01E-01 | 1,71E-10 | 2,77E-08 |

|                 |              |          |           |          |          |
|-----------------|--------------|----------|-----------|----------|----------|
| ENSG00000156738 | MS4A1        | 1,25E+14 | -5,97E-01 | 2,39E-69 | 1,37E-66 |
| ENSG00000008853 | RHOBTB2      | 9,04E+14 | -5,94E-01 | 1,54E-10 | 2,39E-07 |
| <b>D1</b>       |              |          |           |          |          |
| ENSG00000154262 | ABCA6        | 7,03E+14 | -4,01E-01 | 1,63E+04 | 2,01E+05 |
| ENSG00000138756 | BMP2K        | 9,62E+14 | -3,67E-01 | 1,38E+05 | 1,42E+07 |
| ENSG00000117322 | CR2          | 4,63E+14 | -3,64E-01 | 3,76E-09 | 1,93E-06 |
| ENSG00000162631 | NTNG1        | 3,77E+14 | -3,32E-01 | 6,42E+08 | 2,89E-04 |
| ENSG00000143297 | FCRL5        | 5,44E+14 | -3,28E-01 | 6,45E+08 | 2,89E-04 |
| ENSG00000178695 | KCTD12       | 4,41E+14 | -3,27E-01 | 6,27E+08 | 2,84E-04 |
| ENSG00000105851 | PIK3CG       | 5,33E+14 | -3,11E-01 | 2,91E+07 | 1,48E-04 |
| ENSG00000244921 | CTB-36O1.7   | 4,78E+14 | -3,07E-01 | 1,87E+09 | 7,23E-04 |
| ENSG00000118308 | LRMP         | 4,72E+14 | -2,99E-01 | 2,75E-01 | 6,23E+01 |
| ENSG00000211456 | SACM1L       | 7,37E+13 | -2,96E-01 | 2,44E+08 | 1,27E-04 |
| <b>D2</b>       |              |          |           |          |          |
| ENSG00000273149 | RP11-290D2.6 | 9,61E+14 | -3,74E-01 | 1,18E+06 | 2,94E+08 |
| ENSG00000117322 | CR2          | 1,61E+14 | -3,67E-01 | 1,12E-02 | 7,19E+00 |
| ENSG00000163683 | C4orf34      | 1,99E+14 | -3,57E-01 | 6,07E-02 | 3,50E+01 |
| ENSG00000226979 | LTA          | 1,48E+14 | -3,32E-01 | 1,72E+01 | 7,86E+03 |
| ENSG00000128218 | VPREB3       | 1,08E+14 | -3,26E-01 | 1,03E+08 | 1,78E-04 |
| ENSG00000158481 | CD1C         | 1,72E+14 | -3,15E-01 | 3,23E+08 | 4,85E-04 |
| ENSG00000272398 | CD24         | 3,99E+14 | -3,00E-01 | 3,86E+07 | 5,42E-04 |
| ENSG00000158050 | DUSP2        | 3,61E+14 | -2,65E-01 | 1,37E+05 | 4,07E+06 |
| ENSG00000203710 | CR1          | 2,89E+13 | -2,62E-01 | 7,37E+09 | 7,84E-03 |
| ENSG00000154262 | ABCA6        | 8,22E+14 | -2,55E-01 | 3,68E+07 | 5,30E-04 |
| <b>D3</b>       |              |          |           |          |          |
| ENSG00000154262 | ABCA6        | 1,07E+14 | -4,78E-01 | 4,79E-02 | 1,34E+01 |
| ENSG00000226979 | LTA          | 1,85E+14 | -4,77E-01 | 1,33E-09 | 6,18E-07 |
| ENSG00000188404 | SELL         | 8,72E+14 | -4,65E-01 | 6,60E-03 | 1,80E+01 |

|                 |            |          |           |          |          |
|-----------------|------------|----------|-----------|----------|----------|
| ENSG00000008853 | RHOBTB2    | 3,78E+14 | -4,37E-01 | 2,37E+05 | 3,45E+07 |
| ENSG00000158481 | CD1C       | 1,91E+14 | -4,31E-01 | 8,86E+06 | 1,08E+09 |
| ENSG00000161929 | SCIMP      | 1,06E+14 | -4,00E-01 | 3,35E+02 | 6,77E+04 |
| ENSG00000163683 | C4orf34    | 1,74E+14 | -3,79E-01 | 1,48E-01 | 3,80E+01 |
| ENSG00000118308 | LRMP       | 4,03E+14 | -3,77E-01 | 9,66E-10 | 4,33E-06 |
| ENSG00000128218 | VPREB3     | 1,07E+14 | -3,76E-01 | 3,14E+08 | 2,79E-04 |
| ENSG00000117322 | CR2        | 2,81E+14 | -3,68E-01 | 2,42E-05 | 9,20E-03 |
| <b>D4</b>       |            |          |           |          |          |
| ENSG00000163683 | C4orf34    | 1,92E+14 | -5,08E-01 | 4,83E-22 | 2,52E-19 |
| ENSG00000154262 | ABCA6      | 6,91E+14 | -4,40E-01 | 1,00E+00 | 2,38E+02 |
| ENSG00000156738 | MS4A1      | 1,03E+14 | -3,85E-01 | 1,82E-34 | 1,30E-31 |
| ENSG00000144218 | AFF3       | 5,87E+14 | -3,60E-01 | 4,01E+03 | 6,29E+06 |
| ENSG00000118308 | LRMP       | 5,31E+14 | -3,52E-01 | 8,34E-17 | 3,44E-14 |
| ENSG00000167483 | FAM129C    | 5,13E+14 | -3,31E-01 | 1,86E+05 | 2,28E+08 |
| ENSG00000140678 | ITGAX      | 7,73E+14 | -3,15E-01 | 1,24E+06 | 1,54E+07 |
| ENSG00000079931 | MOXD1      | 4,60E+14 | -3,13E-01 | 2,12E+06 | 2,35E+09 |
| ENSG00000127946 | HIP1       | 4,67E+14 | -2,78E-01 | 6,94E+08 | 5,92E-04 |
| ENSG00000162631 | NTNG1      | 4,90E+14 | -2,61E-01 | 2,42E+09 | 1,76E-03 |
| <b>N1</b>       |            |          |           |          |          |
| ENSG00000154262 | ABCA6      | 7,03E+14 | -4,01E-01 | 1,63E+04 | 2,01E+05 |
| ENSG00000138756 | BMP2K      | 9,62E+14 | -3,67E-01 | 1,38E+05 | 1,42E+07 |
| ENSG00000117322 | CR2        | 4,63E+14 | -3,64E-01 | 3,76E-09 | 1,93E-06 |
| ENSG00000162631 | NTNG1      | 3,77E+14 | -3,32E-01 | 6,42E+08 | 2,89E-04 |
| ENSG00000143297 | FCRL5      | 5,44E+14 | -3,28E-01 | 6,45E+08 | 2,89E-04 |
| ENSG00000178695 | KCTD12     | 4,41E+14 | -3,27E-01 | 6,27E+08 | 2,84E-04 |
| ENSG00000105851 | PIK3CG     | 5,33E+14 | -3,11E-01 | 2,91E+07 | 1,48E-04 |
| ENSG00000244921 | CTB-36O1.7 | 4,78E+14 | -3,07E-01 | 1,87E+09 | 7,23E-04 |
| ENSG00000118308 | LRMP       | 4,72E+14 | -2,99E-01 | 2,75E-01 | 6,23E+01 |

|                 |               |          |           |          |          |
|-----------------|---------------|----------|-----------|----------|----------|
| ENSG00000211456 | SACM1L        | 7,37E+13 | -2,96E-01 | 2,44E+08 | 1,27E-04 |
| <b>N2</b>       |               |          |           |          |          |
| 0 genes         |               |          |           |          |          |
| <b>N3</b>       |               |          |           |          |          |
| ENSG00000122566 | HNRNPA2B1     | 4,58E+13 | -2,68E-01 | 1,02E+02 | 1,43E+03 |
| ENSG00000115053 | NCL           | 6,92E+14 | -2,64E-01 | 2,72E+01 | 8,86E+04 |
| ENSG00000080824 | HSP90AA1      | 4,70E+14 | -2,56E-01 | 1,32E+02 | 1,43E+03 |
| ENSG00000038219 | BOD1L1        | 2,19E+14 | -2,34E-01 | 3,51E+05 | 2,29E+08 |
| ENSG00000107581 | EIF3A         | 4,77E+12 | -2,30E-01 | 5,54E+02 | 4,51E+05 |
| ENSG00000100941 | PNN           | 1,43E+14 | -2,30E-01 | 7,20E+06 | 2,93E+08 |
| ENSG00000124831 | LRRFIP1       | 2,33E+14 | -2,10E-01 | 2,66E+07 | 9,64E+09 |
| ENSG00000169564 | PCBP1         | 1,56E+14 | -2,06E-01 | 1,98E+09 | 3,40E-03 |
| ENSG00000148773 | MKI67         | 5,71E+14 | -2,01E-01 | 1,32E+06 | 6,14E+08 |
| ENSG00000099783 | HNRNPM        | 1,65E+14 | -1,99E-01 | 1,68E+08 | 3,04E-03 |
| <b>N4</b>       |               |          |           |          |          |
| ENSG00000247627 | MTND4P12      | 1,70E+14 | -1,92E-01 | 3,14E+09 | 5,14E-02 |
| ENSG00000187514 | PTMA          | 1,53E+14 | -1,18E-01 | 7,95E+09 | 7,41E-02 |
| <b>N5</b>       |               |          |           |          |          |
| ENSG00000277224 | HIST1H2BF     | 2,40E+14 | -2,12E-01 | 4,97E+06 | 1,58E-04 |
| ENSG00000255823 | MTRNR2L8      | 1,49E+14 | -1,88E-01 | 6,47E+04 | 4,13E+07 |
| ENSG00000159840 | ZYX           | 5,08E+14 | -1,81E-01 | 2,48E-04 | 7,18E-02 |
| ENSG00000225972 | MTND1P23      | 7,60E+14 | -1,77E-01 | 2,66E-04 | 7,38E-02 |
| ENSG00000227081 | RP11-543P15.1 | 5,74E+14 | -1,74E-01 | 3,13E+08 | 3,99E-03 |
| ENSG00000115268 | RPS15         | 3,53E+14 | -1,68E-01 | 1,44E+09 | 1,31E-02 |
| ENSG00000112514 | CUTA          | 9,90E+14 | -1,65E-01 | 2,46E-04 | 7,18E-02 |
| ENSG00000273703 | HIST1H2BM     | 3,51E+14 | -1,64E-01 | 2,49E+09 | 1,98E-02 |
| ENSG00000203814 | HIST2H2BF     | 6,24E+14 | -1,53E-01 | 2,52E+08 | 3,99E-03 |
| ENSG00000275379 | HIST1H3I      | 2,28E+14 | -1,40E-01 | 3,54E-04 | 9,02E-02 |

**N6**

|                 |            |          |           |          |          |
|-----------------|------------|----------|-----------|----------|----------|
| ENSG00000244879 | GABPB1-AS1 | 1,17E+14 | -2,04E-01 | 1,06E+09 | 1,02E-03 |
| ENSG00000154265 | ABCA5      | 1,25E+14 | -1,77E-01 | 7,62E+09 | 3,60E-03 |
| ENSG00000245532 | NEAT1      | 6,04E+14 | -1,56E-01 | 2,09E+07 | 4,87E+09 |
| ENSG00000129317 | PUS7L      | 1,43E+14 | -1,37E-01 | 1,70E-03 | 3,90E-02 |
| ENSG00000173889 | PHC3       | 1,84E+14 | -1,34E-01 | 1,62E-03 | 3,79E-02 |
| ENSG00000089775 | ZBTB25     | 1,12E+14 | -1,34E-01 | 4,99E-03 | 7,94E-02 |
| ENSG00000172493 | AFF1       | 1,95E+14 | -1,27E-01 | 1,48E-03 | 3,65E-02 |
| ENSG00000137845 | ADAM10     | 1,19E+14 | -1,27E-01 | 5,21E-03 | 8,14E-02 |
| ENSG00000122257 | RBBP6      | 1,27E+14 | -1,21E-01 | 6,01E-03 | 8,78E-02 |
| ENSG00000149289 | ZC3H12C    | 4,22E+14 | -1,21E-01 | 7,47E+09 | 3,60E-03 |
