# Supplementary material
Source: PubMed Central journal article supplement (PMC6336507)
Supplement: NIHMS987816-supplement-Supp_TableS3.pdf [file NIHMS987816-supplement-Supp_TableS3.pdf]

**Supplemental Table 3** – Top 10 exons differentially expressed with highest log2 fold change upon IFN- $\gamma$  *in vitro* treatment

| Ensembl ID      | Ensembl Name | Exon | Width | Strand | Exon Base Mean | log2 Fold Change | pvalue   | padj     |
|-----------------|--------------|------|-------|--------|----------------|------------------|----------|----------|
| <b>C1</b>       |              |      |       |        |                |                  |          |          |
| ENSG00000132646 | PCNA         | E007 | 112   | -      | 1,91E+14       | 2,95E-01         | 1,10E+09 | 6,03E-03 |
| ENSG00000134516 | DOCK2        | E060 | 47    | +      | 2,27E+14       | 2,22E-01         | 6,50E+06 | 1,71E-04 |
| ENSG00000119335 | SET          | E027 | 24    | +      | 6,69E+14       | 2,18E-01         | 1,39E+08 | 1,65E-03 |
| ENSG00000119335 | SET          | E028 | 70    | +      | 9,34E+14       | 2,05E-01         | 1,30E+09 | 6,51E-03 |
| ENSG00000163468 | CCT3         | E003 | 22    | -      | 1,81E+13       | 1,91E-01         | 1,14E-04 | 2,81E-02 |
| ENSG00000091651 | ORC6         | E023 | 307   | +      | 2,07E+14       | 1,85E-01         | 4,54E+07 | 3,50E-03 |
| ENSG00000140350 | ANP32A       | E006 | 10    | -      | 1,80E+14       | 1,82E-01         | 1,24E-04 | 2,96E-02 |
| ENSG00000086758 | HUWE1        | E027 | 137   | -      | 2,19E+13       | 1,76E-01         | 1,19E+09 | 6,19E-03 |
| ENSG00000150459 | SAP18        | E004 | 67    | +      | 2,07E+14       | 1,74E-01         | 1,44E+09 | 6,82E-03 |
| ENSG00000136628 | EPRS         | E040 | 85    | -      | 2,53E+14       | 1,71E-01         | 5,50E+08 | 3,95E-03 |
| <b>C2</b>       |              |      |       |        |                |                  |          |          |
| ENSG00000140105 | WARS         | E081 | 1     | -      | 1,33E+14       | 1,08E+14         | 4,40E+06 | 4,77E-04 |
| ENSG00000140105 | WARS         | E080 | 36    | -      | 1,94E+14       | 1,06E+14         | 4,71E+00 | 1,30E+05 |
| ENSG00000140105 | WARS         | E078 | 2     | -      | 1,45E+14       | 1,06E+14         | 1,64E+04 | 2,91E+08 |
| ENSG00000140105 | WARS         | E079 | 35    | -      | 1,67E+12       | 1,00E+14         | 4,71E+03 | 9,77E+07 |
| ENSG00000140105 | WARS         | E082 | 46    | -      | 1,31E+14       | 1,10E+12         | 1,08E+06 | 1,34E-04 |
| ENSG00000140105 | WARS         | E077 | 6     | -      | 1,62E+14       | 9,23E-01         | 3,93E+05 | 5,75E+09 |
| ENSG00000140105 | WARS         | E076 | 61    | -      | 5,26E+14       | 8,59E-01         | 1,18E-09 | 1,46E-04 |
| ENSG00000140105 | WARS         | E075 | 3     | -      | 4,95E+14       | 8,39E-01         | 2,13E-07 | 7,56E-03 |
| ENSG00000140105 | WARS         | E074 | 48    | -      | 9,41E+14       | 6,81E-01         | 6,90E-12 | 1,72E-06 |
| ENSG00000140105 | WARS         | E073 | 5     | -      | 1,05E+14       | 6,06E-01         | 4,92E-09 | 3,06E-04 |
| <b>C3</b>       |              |      |       |        |                |                  |          |          |

|                 |      |      |    |   |          |          |          |          |
|-----------------|------|------|----|---|----------|----------|----------|----------|
| ENSG00000140105 | WARS | E078 | 2  | - | 1,11E+12 | 1,09E+14 | 1,41E+06 | 2,91E-04 |
| ENSG00000140105 | WARS | E077 | 6  | - | 1,15E+14 | 1,08E+14 | 3,47E+06 | 6,60E-04 |
| ENSG00000140105 | WARS | E079 | 35 | - | 1,15E+14 | 1,04E+14 | 7,78E+06 | 1,38E-03 |
| ENSG00000140105 | WARS | E075 | 3  | - | 3,05E+14 | 9,90E-01 | 4,52E-03 | 2,37E+02 |
| ENSG00000140105 | WARS | E076 | 61 | - | 3,27E+14 | 9,88E-01 | 1,94E-03 | 1,60E+02 |
| ENSG00000140105 | WARS | E074 | 48 | - | 5,16E+14 | 7,86E-01 | 5,04E-07 | 6,24E-01 |
| ENSG00000140105 | WARS | E089 | 26 | - | 6,79E+12 | 6,91E-01 | 4,76E-06 | 6,24E-01 |
| ENSG00000140105 | WARS | E072 | 3  | - | 5,85E+14 | 6,79E-01 | 4,79E-03 | 2,37E+02 |
| ENSG00000140105 | WARS | E073 | 5  | - | 5,53E+14 | 6,73E-01 | 6,74E-02 | 2,78E+03 |
| ENSG00000140105 | WARS | E071 | 3  | - | 5,89E+14 | 6,52E-01 | 1,18E-01 | 4,18E+03 |
| <b>C4</b>       |      |      |    |   |          |          |          |          |
| ENSG00000140105 | WARS | E082 | 46 | - | 9,04E+14 | 9,78E-01 | 3,30E+08 | 2,75E-02 |
| ENSG00000140105 | WARS | E081 | 1  | - | 9,06E+14 | 9,78E-01 | 2,79E+08 | 2,46E-02 |
| ENSG00000140105 | WARS | E074 | 48 | - | 4,90E+14 | 9,65E-01 | 4,29E-13 | 1,32E-07 |
| ENSG00000140105 | WARS | E080 | 36 | - | 1,30E+14 | 9,01E-01 | 1,31E+08 | 1,27E-02 |
| ENSG00000140105 | WARS | E076 | 61 | - | 3,18E+14 | 8,89E-01 | 1,17E+04 | 2,13E+08 |
| ENSG00000140105 | WARS | E075 | 3  | - | 3,08E+14 | 8,83E-01 | 1,24E+05 | 2,01E+09 |
| ENSG00000140105 | WARS | E098 | 19 | - | 2,57E+14 | 8,69E-01 | 1,08E+07 | 1,08E-02 |
| ENSG00000140105 | WARS | E073 | 5  | - | 5,51E+14 | 8,09E-01 | 3,97E-07 | 4,08E-02 |
| ENSG00000140105 | WARS | E093 | 3  | - | 3,99E+14 | 7,85E-01 | 8,52E+03 | 1,64E+08 |
| ENSG00000140105 | WARS | E097 | 2  | - | 2,97E+14 | 7,83E-01 | 4,20E+06 | 5,39E-04 |
| <b>C5</b>       |      |      |    |   |          |          |          |          |
| ENSG00000140105 | WARS | E079 | 35 | - | 1,96E+14 | 1,68E+14 | 1,39E+03 | 1,50E+07 |
| ENSG00000140105 | WARS | E080 | 36 | - | 2,07E+14 | 1,67E+14 | 8,40E+02 | 9,82E+06 |
| ENSG00000140105 | WARS | E077 | 6  | - | 1,79E+14 | 1,67E+14 | 3,13E+05 | 2,56E+09 |
| ENSG00000140105 | WARS | E078 | 2  | - | 1,75E+13 | 1,64E+14 | 4,96E+04 | 4,68E+08 |

|                 |              |      |      |   |          |          |          |          |
|-----------------|--------------|------|------|---|----------|----------|----------|----------|
| ENSG00000140105 | WARS         | E082 | 46   | - | 1,35E+14 | 1,50E+14 | 3,35E+07 | 1,71E-03 |
| ENSG00000140105 | WARS         | E081 | 1    | - | 1,37E+14 | 1,47E+14 | 3,09E+07 | 1,65E-03 |
| ENSG00000140105 | WARS         | E076 | 61   | - | 4,34E+13 | 1,43E+14 | 3,21E-21 | 9,85E-17 |
| ENSG00000140105 | WARS         | E074 | 48   | - | 7,13E+14 | 1,25E+14 | 4,89E-25 | 2,00E-20 |
| ENSG00000140105 | WARS         | E073 | 5    | - | 7,74E+14 | 1,08E+14 | 5,42E-34 | 3,33E-30 |
| ENSG00000140105 | WARS         | E072 | 3    | - | 8,20E+14 | 1,06E+14 | 2,27E-39 | 2,79E-34 |
| <b>D1</b>       |              |      |      |   |          |          |          |          |
| ENSG00000140105 | WARS         | E074 | 48   | - | 6,93E+14 | 6,29E-01 | 3,31E+05 | 2,52E+09 |
| ENSG00000140105 | WARS         | E073 | 5    | - | 8,06E+14 | 5,59E-01 | 1,91E-01 | 7,40E+02 |
| ENSG00000140105 | WARS         | E072 | 3    | - | 8,52E+14 | 5,52E-01 | 5,78E-02 | 6,34E+03 |
| ENSG00000140105 | WARS         | E071 | 3    | - | 8,93E+14 | 5,34E-01 | 2,34E-01 | 7,40E+02 |
| ENSG00000140105 | WARS         | E089 | 26   | - | 8,99E+14 | 5,24E-01 | 2,70E-01 | 7,40E+02 |
| ENSG00000140105 | WARS         | E090 | 2    | - | 6,00E+14 | 5,15E-01 | 3,05E+04 | 3,72E+08 |
| ENSG00000140105 | WARS         | E091 | 12   | - | 5,88E+13 | 5,07E-01 | 7,32E+04 | 7,30E+08 |
| ENSG00000157873 | TNFRSF1<br>4 | E014 | 14   | + | 5,35E+14 | 3,86E-01 | 3,35E+08 | 1,02E-02 |
| ENSG00000146263 | MMS22L       | E036 | 2420 | - | 5,16E+14 | 3,82E-01 | 8,40E+08 | 2,09E-02 |
| ENSG00000126777 | KTN1         | E094 | 7    | + | 6,36E+14 | 3,44E-01 | 1,97E+09 | 4,01E-02 |
| <b>D2</b>       |              |      |      |   |          |          |          |          |
| ENSG00000140105 | WARS         | E075 | 3    | - | 5,68E+14 | 5,93E-01 | 4,03E+01 | 7,46E+05 |
| ENSG00000140105 | WARS         | E076 | 61   | - | 5,65E+14 | 5,70E-01 | 1,14E+03 | 1,80E+07 |
| ENSG00000140105 | WARS         | E074 | 48   | - | 9,33E+14 | 5,19E-01 | 3,07E-02 | 1,71E+03 |
| ENSG00000140105 | WARS         | E071 | 3    | - | 1,05E+14 | 4,94E-01 | 9,31E-04 | 1,03E+03 |
| ENSG00000140105 | WARS         | E073 | 5    | - | 9,89E+14 | 4,84E-01 | 4,37E-01 | 1,21E+03 |
| ENSG00000140105 | WARS         | E072 | 3    | - | 1,03E+14 | 4,80E-01 | 1,75E-01 | 6,48E+03 |
| ENSG00000140105 | WARS         | E091 | 12   | - | 5,89E+14 | 3,90E-01 | 1,69E+08 | 1,34E-02 |

|                 |       |      |     |   |          |           |          |          |
|-----------------|-------|------|-----|---|----------|-----------|----------|----------|
| ENSG00000140105 | WARS  | E089 | 26  | - | 9,16E+14 | 3,79E-01  | 3,33E+05 | 4,11E+09 |
| ENSG00000140105 | WARS  | E090 | 2   | - | 6,17E+14 | 3,77E-01  | 1,66E+08 | 1,34E-02 |
| ENSG00000137154 | RPS6  | E007 | 147 | - | 8,18E+14 | -2,31E-02 | 2,35E+08 | 1,74E-02 |
| <b>D3</b>       |       |      |     |   |          |           |          |          |
| ENSG00000140105 | WARS  | E082 | 46  | - | 1,54E+14 | 9,04E-01  | 7,84E+04 | 1,38E-04 |
| ENSG00000140105 | WARS  | E081 | 1   | - | 1,56E+14 | 8,85E-01  | 1,29E+06 | 1,94E-04 |
| ENSG00000140105 | WARS  | E080 | 36  | - | 2,54E+14 | 8,83E-01  | 4,43E+01 | 1,63E+06 |
| ENSG00000140105 | WARS  | E079 | 35  | - | 2,67E+14 | 8,42E-01  | 3,08E+02 | 9,45E+06 |
| ENSG00000140105 | WARS  | E078 | 2   | - | 2,39E+14 | 8,41E-01  | 3,67E+04 | 9,66E+08 |
| ENSG00000140105 | WARS  | E075 | 3   | - | 6,15E+14 | 8,15E-01  | 1,56E-11 | 2,54E-06 |
| ENSG00000140105 | WARS  | E076 | 61  | - | 6,38E+14 | 8,11E-01  | 1,82E-10 | 1,68E-05 |
| ENSG00000140105 | WARS  | E077 | 6   | - | 2,45E+14 | 8,06E-01  | 4,86E+05 | 9,43E+09 |
| ENSG00000140105 | WARS  | E074 | 48  | - | 1,01E+14 | 7,16E-01  | 2,63E-17 | 9,69E-12 |
| ENSG00000140105 | WARS  | E073 | 5   | - | 1,05E+14 | 6,96E-01  | 2,07E-11 | 2,54E-06 |
| <b>D4</b>       |       |      |     |   |          |           |          |          |
| ENSG00000167258 | CDK12 | E021 | 722 | + | 1,62E+14 | 8,38E-01  | 1,66E+08 | 1,74E-02 |
| ENSG00000163050 | ADCK3 | E032 | 142 | + | 2,02E+14 | -6,92E-01 | 9,56E+07 | 1,13E-02 |
| ENSG00000133313 | CNDP2 | E011 | 49  | + | 3,04E+14 | 5,76E-01  | 5,47E+07 | 7,39E-03 |
| ENSG00000140105 | WARS  | E071 | 3   | - | 1,13E+14 | 5,37E-01  | 4,23E-03 | 4,01E+02 |
| ENSG00000140105 | WARS  | E074 | 48  | - | 9,25E+14 | 5,31E-01  | 2,65E+00 | 1,00E+05 |
| ENSG00000140105 | WARS  | E072 | 3   | - | 1,10E+13 | 5,19E-01  | 3,13E-01 | 1,48E+04 |
| ENSG00000140105 | WARS  | E075 | 3   | - | 5,69E+14 | 5,12E-01  | 5,72E+05 | 9,03E+09 |
| ENSG00000140105 | WARS  | E073 | 5   | - | 1,03E+14 | 5,07E-01  | 2,22E-02 | 1,40E+03 |
| ENSG00000140105 | WARS  | E076 | 61  | - | 6,06E+14 | 5,07E-01  | 3,07E+04 | 7,27E+07 |
| ENSG00000140105 | WARS  | E089 | 26  | - | 9,34E+14 | 4,02E-01  | 4,83E+03 | 1,02E+09 |
| <b>N1</b>       |       |      |     |   |          |           |          |          |

|                 |             |      |       |   |          |           |          |          |
|-----------------|-------------|------|-------|---|----------|-----------|----------|----------|
| 0 genes         |             |      |       |   |          |           |          |          |
| <b>N2</b>       |             |      |       |   |          |           |          |          |
| 0 genes         |             |      |       |   |          |           |          |          |
| <b>N3</b>       |             |      |       |   |          |           |          |          |
| 0 genes         |             |      |       |   |          |           |          |          |
| <b>N4</b>       |             |      |       |   |          |           |          |          |
| 0 genes         |             |      |       |   |          |           |          |          |
| <b>N5</b>       |             |      |       |   |          |           |          |          |
| ENSG00000155368 | DBI         | E026 | 19    | + | 3,19E+14 | -2,55E-01 | 9,81E+00 | 7,75E+05 |
| ENSG00000172809 | RPL38       | E012 | 171   | + | 1,74E+14 | -2,43E-01 | 6,57E+09 | 2,55E-02 |
| ENSG00000197958 | RPL12       | E002 | 3     | - | 4,13E+14 | -2,03E-01 | 1,40E+03 | 6,33E+06 |
| ENSG00000156508 | EEF1A1      | E003 | 4     | - | 3,81E+14 | -2,02E-01 | 9,65E+04 | 2,54E+08 |
| ENSG00000156508 | EEF1A1      | E004 | 2     | - | 4,02E+14 | -2,01E-01 | 3,71E+05 | 8,38E+08 |
| ENSG00000171858 | RPS21       | E010 | 201   | + | 1,81E+14 | -1,97E-01 | 1,47E+09 | 7,47E-03 |
| ENSG00000169567 | HINT1       | E020 | 16    | - | 1,74E+14 | 1,77E-01  | 1,46E-04 | 4,50E-02 |
| ENSG00000145287 | PLAC8       | E001 | 640   | - | 2,01E+14 | -1,77E-01 | 2,45E+09 | 1,17E-02 |
| ENSG00000135486 | HNRNPA<br>1 | E036 | 37    | + | 1,93E+14 | -1,76E-01 | 6,78E+09 | 2,55E-02 |
| ENSG00000197756 | RPL37A      | E004 | 5     | + | 1,95E+14 | 1,74E-01  | 6,12E+09 | 2,42E-02 |
| <b>N6</b>       |             |      |       |   |          |           |          |          |
| ENSG00000127314 | RAP1B       | E072 | 11379 | + | 1,41E+14 | 2,52E-01  | 5,65E+07 | 9,72E-03 |
| ENSG00000090060 | PAPOLA      | E017 | 82    | + | 1,26E+14 | 2,44E-01  | 6,78E+08 | 3,12E-02 |
| ENSG00000070831 | CDC42       | E017 | 23    | + | 2,56E+14 | 1,82E-01  | 8,45E+08 | 3,12E-02 |
| ENSG00000131469 | RPL27       | E017 | 2     | + | 2,28E+14 | 1,76E-01  | 1,39E+09 | 4,23E-02 |
| ENSG00000112996 | MRPS30      | E020 | 3986  | + | 3,94E+14 | 1,36E-01  | 3,62E+08 | 2,07E-02 |
| ENSG00000143321 | HDGF        | E002 | 416   | - | 6,75E+14 | 9,63E-02  | 9,73E+08 | 3,23E-02 |

|                 |          |      |      |   |          |          |          |          |
|-----------------|----------|------|------|---|----------|----------|----------|----------|
| ENSG00000196735 | HLA-DQA1 | E023 | 3410 | + | 1,56E+14 | 6,39E-02 | 2,95E+08 | 2,07E-02 |
| ENSG00000065978 | YBX1     | E029 | 236  | + | 2,25E+14 | 5,07E-02 | 4,01E+08 | 2,07E-02 |
| ENSG00000108518 | PFN1     | E002 | 331  | - | 8,92E+14 | 2,83E-02 | 4,61E+05 | 2,38E-04 |
| ENSG00000111640 | GAPDH    | E014 | 100  | + | 1,38E+14 | 1,92E-02 | 7,73E+07 | 9,98E-03 |
