# Supplementary material
Source: PubMed Central journal article supplement (PMC6336507)
Supplement: NIHMS987816-supplement-Supp_TableS4.pdf [file NIHMS987816-supplement-Supp_TableS4.pdf]

**Supplemental Table 4– Top 10 most abundant expressed transcripts upon IFN- $\gamma$  treatment *in vitro***

| Target ID       | Transcript  | p-value   | Mean Obs            | Technical Variance       | Final SD $\sigma$ (Sigma) Sq |
|-----------------|-------------|-----------|---------------------|--------------------------|------------------------------|
| <b>C1</b>       |             |           |                     |                          |                              |
| ENST00000409652 | APOL6-001   | 2,47E-211 | 786.274.056.203.251 | 0.00048594583057925<br>5 | 0.00150001881312397          |
| ENST00000370473 | GBP1-001    | 2,30E-200 | 696.076.869.800.727 | 0.00142854766094091      | 0.00200927037540136          |
| ENST00000432676 | UBD-001     | 7,09E-191 | 612.199.790.810.136 | 0.00577781115646841      | 0.00316452445008396          |
| ENST00000358655 | WARS-004    | 4,02E-174 | 865.366.605.893.861 | 0.00261026678259432      | 0.00144147246583121          |
| ENST00000370466 | GBP2-002    | 1,63E-149 | 655.602.517.310.412 | 0.00252879507454823      | 0.00246153589456306          |
| ENST00000355754 | GBP4-001    | 4,05E-147 | 719.548.324.263.814 | 0.00103705184764918      | 0.00182007399640909          |
| ENST00000354258 | TAP1-001    | 4,00E-88  | 68.753.215.353.452  | 0.00027120502787946<br>6 | 0.00209039769333331          |
| ENST00000383235 | TAP1-001    | 4,00E-88  | 68.753.215.353.452  | 0.00027120502787946<br>6 | 0.00209039769333331          |
| ENST00000414467 | TAP1-001    | 4,00E-88  | 68.753.215.353.452  | 0.00027120502787946<br>6 | 0.00209039769333331          |
| ENST00000418205 | TAP1-001    | 4,00E-88  | 68.753.215.353.452  | 0.00027120502787946<br>6 | 0.00209039769333331          |
| <b>C2</b>       |             |           |                     |                          |                              |
| ENST00000355754 | GBP4-001    | 1,38E-170 | 699.348.966.948.673 | 0.00115506574616537      | 0.0011276566788513           |
| ENST00000370466 | GBP2-002    | 2,02E-150 | 708.761.258.684.099 | 0.00105544289279574      | 0.00105899007653538          |
| ENST00000370473 | GBP1-001    | 3,83E-127 | 700.507.964.257.049 | 0.00095741508521073<br>3 | 0.00111882135356246          |
| ENST00000409652 | APOL6-001   | 2,88E-110 | 754.828.312.996.642 | 0.00058613298335289<br>4 | 0.000809124664595632         |
| ENST00000358655 | WARS-004    | 1,24E-89  | 798.146.597.947.958 | 0.00495326348921036      | 0.000672358017553688         |
| ENST00000361099 | STAT1-001   | 3,53E-71  | 906.051.231.959.164 | 0.00033223968455769<br>1 | 0.000740351802899365         |
| ENST00000236147 | SELL-001    | 1,27E-54  | 668.603.330.204.392 | 0.00177897521878494      | 0.00140645091554337          |
| ENST00000472045 | IRF1-006    | 2,21E-37  | 635.150.203.225.157 | 0.00270603996849108      | 0.0018305992967021           |
| ENST00000392322 | STAT1-003   | 3,15E-39  | 796.620.254.267.135 | 0.00153272692112248      | 0.00167086952434884          |
| ENST00000379982 | RHOBTB3-001 | 1,91E-36  | 681.144.453.207.399 | 0.00126139519313697      | 0.00128173759615091          |

| <b>C3</b>       |           |           |                     |                          |                      |
|-----------------|-----------|-----------|---------------------|--------------------------|----------------------|
| ENST00000409652 | APOL6-001 | 3,39E-182 | 803.509.513.257.216 | 0.00039355791468927<br>8 | 0.00137043775584674  |
| ENST00000370473 | GBP1-001  | 4,27E-177 | 722.358.879.820.408 | 0.00094050565264298<br>7 | 0.0013392438952881   |
| ENST00000370466 | GBP2-002  | 9,80E-100 | 686.268.374.650.986 | 0.0014349493568959       | 0.00163178888416445  |
| ENST00000355754 | GBP4-001  | 1,86E-74  | 762.329.789.808.398 | 0.00063178311006654<br>4 | 0.00113059495943011  |
| ENST00000472045 | IRF1-006  | 3,99E-53  | 662.945.916.092.617 | 0.00174387788022089      | 0.00189017381225653  |
| ENST00000554772 | WARS-017  | 1,75E-45  | 263.163.995.029.839 | 0.0240711657581189       | 0.231069510476259    |
| ENST00000233055 | WDFY1-001 | 1,60E-42  | 726.446.522.466.065 | 0.00077494945419680<br>5 | 0.00131293691421011  |
| ENST00000358655 | WARS-004  | 3,31E-36  | 800.443.935.206.198 | 0.00453487674379911      | 0.00281453028759277  |
| ENST00000354258 | TAP1-001  | 1,49E-28  | 694.269.126.154.593 | 0.00025563487548401<br>8 | 0.00253348309094412  |
| ENST00000383235 | TAP1-001  | 1,49E-28  | 694.269.126.154.593 | 0.00025563487548401<br>8 | 0.00253348309094412  |
| <b>C4</b>       |           |           |                     |                          |                      |
| ENST00000370473 | GBP1-001  | 1,28E-164 | 665.388.251.476.537 | 0.00163052720265723      | 0.00173059937207567  |
| ENST00000355754 | GBP4-001  | 2,42E-155 | 741.689.357.745.985 | 0.00058782835239236      | 0.00113693609481963  |
| ENST00000370466 | GBP2-002  | 1,54E-154 | 681.637.363.968.476 | 0.00150545325394492      | 0.00155738760582201  |
| ENST00000409652 | APOL6-001 | 1,80E-154 | 737.698.431.288.591 | 0.00071429868584626<br>5 | 0.00115621967988161  |
| ENST00000361099 | STAT1-001 | 1,46E-101 | 866.954.173.275.254 | 0.00043271176589544<br>1 | 0.000956342525304736 |
| ENST00000354258 | TAP1-001  | 1,25E-77  | 658.663.118.418.997 | 0.00025868971260943<br>1 | 0.00181175034797581  |
| ENST00000383235 | TAP1-001  | 1,25E-77  | 658.663.118.418.997 | 0.00025868971260943<br>1 | 0.00181175034797581  |
| ENST00000414467 | TAP1-001  | 1,25E-77  | 658.663.118.418.997 | 0.00025868971260943<br>1 | 0.00181175034797581  |
| ENST00000418205 | TAP1-001  | 1,25E-77  | 658.663.118.418.997 | 0.00025868971260943<br>1 | 0.00181175034797581  |
| ENST00000424897 | TAP1-001  | 1,25E-77  | 658.663.118.418.997 | 0.00025868971260943<br>1 | 0.00181175034797581  |
| <b>C5</b>       |           |           |                     |                          |                      |

|                 |            |           |                     |                          |                     |
|-----------------|------------|-----------|---------------------|--------------------------|---------------------|
| ENST00000409652 | APOL6-001  | 1,21E-251 | 729.487.511.975.044 | 0.00076348047358681<br>6 | 0.00140799313642675 |
| ENST00000361099 | STAT1-001  | 5,38E-223 | 868.922.713.207.773 | 0.00063345339463262<br>8 | 0.00108542654997727 |
| ENST00000355754 | GBP4-001   | 9,82E-196 | 681.817.445.987.923 | 0.00114933090955235      | 0.00179723884257544 |
| ENST00000370466 | GBP2-002   | 9,46E-188 | 562.275.390.039.616 | 0.00754254410136648      | 0.0039198285742143  |
| ENST00000370473 | GBP1-001   | 1,15E-175 | 574.164.780.617.069 | 0.00519699116017968      | 0.0036477725034654  |
| ENST00000354258 | TAP1-001   | 2,09E-126 | 6.674.293.922.271   | 0.00026172133938481<br>8 | 0.00195830638308137 |
| ENST00000383235 | TAP1-001   | 2,09E-126 | 6.674.293.922.271   | 0.00026172133938481<br>8 | 0.00195830638308137 |
| ENST00000414467 | TAP1-001   | 2,09E-126 | 6.674.293.922.271   | 0.00026172133938481<br>8 | 0.00195830638308137 |
| ENST00000418205 | TAP1-001   | 2,09E-126 | 6.674.293.922.271   | 0.00026172133938481<br>8 | 0.00195830638308137 |
| ENST00000424897 | TAP1-001   | 2,09E-126 | 6.674.293.922.271   | 0.00026172133938481<br>8 | 0.00195830638308137 |
| <b>D1</b>       |            |           |                     |                          |                     |
| ENST00000383547 | UBD-001    | 4,86E-90  | 597.566.215.872.691 | 0.00424451803707273      | 0.00648173416444172 |
| ENST00000264888 | CXCL9-001  | 1,77E-89  | 451.602.769.172.242 | 0.0373542414730597       | 0.011746103299601   |
| ENST00000355754 | GBP4-001   | 6,58E-63  | 709.402.495.978.207 | 0.00094759013319756<br>5 | 0.00209206364312783 |
| ENST00000306602 | CXCL10-001 | 1,88E-48  | 556.169.694.963.461 | 0.00510824246769279      | 0.00494185645660181 |
| ENST00000409652 | APOL6-001  | 4,00E-42  | 749.421.352.671.177 | 0.00060586474690791<br>9 | 0.00181007218244427 |
| ENST00000392882 | WARS-001   | 6,91E-42  | 81.254.647.596.927  | 0.00357820208101786      | 0.00160898197819638 |
| ENST00000370473 | GBP1-001   | 4,53E-39  | 71.720.967.981.151  | 0.00092974362145387<br>7 | 0.00202583720015002 |
| ENST00000358655 | WARS-004   | 3,27E-24  | 782.961.300.440.485 | 0.00610056679385819      | 0.00471482790646764 |
| ENST00000354258 | TAP1-001   | 1,72E-23  | 68.337.763.145.972  | 0.00019933416158781<br>1 | 0.00235863366610451 |
| ENST00000383235 | TAP1-001   | 1,72E-23  | 68.337.763.145.972  | 0.00019933416158781<br>1 | 0.00235863366610451 |
| <b>D2</b>       |            |           |                     |                          |                     |
| ENST00000383547 | UBD-001    | 6,64E-92  | 63.096.261.076.714  | 0.00240525476014319      | 0.00257579798168468 |

|                 |           |           |                     |                          |                     |
|-----------------|-----------|-----------|---------------------|--------------------------|---------------------|
| ENST00000409652 | APOL6-001 | 1,11E-45  | 784.879.214.153.607 | 0.00043128069000150<br>7 | 0.00124295270619052 |
| ENST00000355754 | GBP4-001  | 4,67E-31  | 685.135.710.145.291 | 0.00118948916893589      | 0.00184085886792667 |
| ENST00000370473 | GBP1-001  | 9,84E-30  | 72.293.055.327.383  | 0.00069313182507938<br>3 | 0.00281985676610293 |
| ENST00000370466 | GBP2-002  | 3,99E-10  | 720.892.153.269.839 | 0.00078723200266175<br>6 | 0.00369338016306297 |
| ENST00000370459 | GBP5-001  | 3,60E-09  | 554.885.574.622.626 | 0.00550579413462458      | 0.00430416059709272 |
| ENST00000392882 | WARS-001  | 9,23E-08  | 840.443.491.989.152 | 0.00271991385798104      | 0.00117101131165993 |
| ENST00000354258 | TAP1-001  | 1,83E-07  | 688.994.552.643.227 | 0.00017626591740427<br>1 | 0.00180244122445603 |
| ENST00000383235 | TAP1-001  | 1,83E-07  | 688.994.552.643.227 | 0.00017626591740427<br>1 | 0.00180244122445603 |
| ENST00000414467 | TAP1-001  | 1,83E-07  | 688.994.552.643.227 | 0.00017626591740427<br>1 | 0.00180244122445603 |
| <b>D3</b>       |           |           |                     |                          |                     |
| ENST00000409652 | APOL6-001 | 5,93E-150 | 793.101.934.289.337 | 0.00036027427863420<br>6 | 0.00126889234700391 |
| ENST00000370473 | GBP1-001  | 1,02E-142 | 699.053.482.352.537 | 0.00088304697459008<br>9 | 0.00184252064624349 |
| ENST00000355754 | GBP4-001  | 5,41E-102 | 739.431.750.592.011 | 0.00068215575413127<br>9 | 0.00152267842375414 |
| ENST00000370466 | GBP2-002  | 1,26E-88  | 740.048.427.318.062 | 0.00074358372196226<br>6 | 0.00151875755174662 |
| ENST00000392882 | WARS-001  | 3,52E-65  | 837.816.004.053.505 | 0.00266914517177068      | 0.00117027907463301 |
| ENST00000354258 | TAP1-001  | 8,47E-63  | 696.381.394.720.445 | 0.00019876375047584<br>6 | 0.00186858160250244 |
| ENST00000383235 | TAP1-001  | 8,47E-63  | 696.381.394.720.445 | 0.00019876375047584<br>6 | 0.00186858160250244 |
| ENST00000414467 | TAP1-001  | 8,47E-63  | 696.381.394.720.445 | 0.00019876375047584<br>6 | 0.00186858160250244 |
| ENST00000418205 | TAP1-001  | 8,47E-63  | 696.381.394.720.445 | 0.00019876375047584<br>6 | 0.00186858160250244 |
| ENST00000424897 | TAP1-001  | 8,47E-63  | 696.381.394.720.445 | 0.00019876375047584<br>6 | 0.00186858160250244 |
| <b>D4</b>       |           |           |                     |                          |                     |
| ENST00000355754 | GBP4-001  | 3,63E-83  | 645.325.226.723.031 | 0.00192363842282313      | 0.00158634917586591 |

|                 |               |                       |                     |                          |                      |
|-----------------|---------------|-----------------------|---------------------|--------------------------|----------------------|
| ENST00000409652 | APOL6-001     | 1,16E-76              | 742.301.646.028.655 | 0.00058076301573623<br>4 | 0.000861597752950973 |
| ENST00000370473 | GBP1-001      | 7,34E-57              | 6.894.672.974.079   | 0.00092143523629919<br>2 | 0.00115512611496235  |
| ENST00000370466 | GBP2-002      | 5,50E-48              | 69.623.594.392.248  | 0.00098301587470791<br>7 | 0.00110614905896271  |
| ENST00000354258 | TAP1-001      | 6,20E-45              | 657.013.045.138.733 | 0.00029023028817848      | 0.0014507232861631   |
| ENST00000383235 | TAP1-001      | 6,20E-45              | 657.013.045.138.733 | 0.00029023028817848      | 0.0014507232861631   |
| ENST00000414467 | TAP1-001      | 6,20E-45              | 657.013.045.138.733 | 0.00029023028817848      | 0.0014507232861631   |
| ENST00000418205 | TAP1-001      | 6,20E-45              | 657.013.045.138.733 | 0.00029023028817848      | 0.0014507232861631   |
| ENST00000424897 | TAP1-001      | 6,20E-45              | 657.013.045.138.733 | 0.00029023028817848      | 0.0014507232861631   |
| ENST00000440894 | TAP1-001      | 6,20E-45              | 657.013.045.138.733 | 0.00029023028817848      | 0.0014507232861631   |
| <b>N1</b>       |               |                       |                     |                          |                      |
| ENST00000369158 | HIST2H3C-001  | 5,00E+06              | 835.263.209.812.554 | 0.00012669558399296<br>6 | 0.000585207695145063 |
| ENST00000403683 | HIST2H3A-001  | 5,00E+06              | 835.263.209.812.554 | 0.00012669558399296<br>6 | 0.000585207695145063 |
| ENST00000614378 | HIST1H3G-001  | 4,84E+07              | 87.468.597.730.417  | 0.00014298081695474<br>8 | 0.00057484242539117  |
| ENST00000470729 | ANKRD30BL-002 | 8,10E+07              | 611.324.536.711.555 | 0.0020710217231923       | 0.00226864049713336  |
| ENST00000621411 | HIST1H3B-001  | 1,94E+08              | 907.728.868.215.613 | 0.00013148848624165<br>9 | 0.000601786292422359 |
| ENST00000426248 | PKP4-003      | 1,04E+09              | 213.007.973.263.328 | 132.244.741.820.693      | 0.492950866174374    |
| ENST00000625842 | VPS8-027      | 1,08E+09              | 181.189.630.734.675 | 122.685.356.695.624      | 0.71675417204608     |
| ENST00000359611 | HIST1H2AM-001 | 2,70E+08              | 81.020.661.101.508  | 0.00030616767188954<br>3 | 0.000616312790413495 |
| ENST00000355057 | HIST1H4J-001  | 3,65E+09              | 950.491.134.096.977 | 6,66E+09                 | 0.000691401313266216 |
| ENST00000398208 | WDR4-001      | 3,34E+09              | 172.589.538.228.197 | 125.423.863.062.181      | 0.785216536916319    |
| <b>N2</b>       |               |                       |                     |                          |                      |
| ENST00000443632 | HIC2-001      | 2,79E+08              | 181.543.186.314.928 | 0.9284835510963          | 0.7912519169242      |
| ENST00000615479 | RPL17-025     | 3,07E+08              | 213.519.253.375.337 | 157.533.267.721.072      | 0.570300575661044    |
| ENST00000000233 | ARF5-001      | 0.9062184<br>78690658 | 609.134.455.648.725 | 0.00446397643708737      | 0.0328000122898146   |

|                 |               |                       |                     |                          |                     |
|-----------------|---------------|-----------------------|---------------------|--------------------------|---------------------|
| ENST00000000412 | M6PR-001      | 0.2896577<br>31012856 | 717.449.151.337.589 | 0.00698054365422691      | 0.00197909797068523 |
| ENST00000000442 | ESRRA-002     | 0.5299244<br>46399801 | 541.546.878.136.441 | 0.127719457796855        | 0.00473878721535213 |
| ENST00000001008 | FKBP4-001     | 0.9789691<br>42737799 | 680.881.716.113.208 | 0.00122336613316713      | 0.00226276418769948 |
| ENST00000002125 | NDUFAF7-001   | 0.4056640<br>01298275 | 448.616.597.558.558 | 0.165819424605375        | 0.0115284336496682  |
| ENST00000002165 | FUCA2-001     | 0.8753297<br>32038193 | 601.438.449.358.444 | 0.00262939251147847      | 0.00719408571723918 |
| ENST00000002501 | DBNDD1-001    | 0.4935272<br>92294963 | 10.249.776.025.938  | 114.042.126.554.936      | 282.534.377.984.394 |
| ENST00000002596 | HS3ST1-001    | 0.9432594<br>4575602  | 498.252.656.908.397 | 0.00664840141576874      | 0.00949392600611162 |
| <b>N3</b>       |               |                       |                     |                          |                     |
| ENST00000216281 | HSP90AA1-002  | 2,22E+03              | 842.316.937.105.889 | 0.00028562027287274<br>3 | 0.00131067316762986 |
| ENST00000040738 | BOD1L1-001    | 2,39E+04              | 754.158.593.009.051 | 0.00066267961130350<br>3 | 0.00111040024118354 |
| ENST00000616533 | ZFAND6-202    | 1,17E+06              | 228.930.085.527.261 | 12.509.306.529.033       | 0.387733271140044   |
| ENST00000409196 | GIGYF2-003    | 6,11E+06              | 201.613.424.746.263 | 0.946574466346331        | 0.555056177835545   |
| ENST00000216832 | PNN-001       | 1,11E+07              | 717.992.371.717.817 | 0.00083502135141632<br>5 | 0.00133002663183435 |
| ENST00000356674 | HNRNPA2B1-002 | 2,09E+07              | 759.222.924.906.434 | 0.00085771894690745<br>9 | 0.00726734675193396 |
| ENST00000244815 | LRRFIP1-001   | 3,08E+07              | 691.280.718.627.652 | 0.00421372354550652      | 0.001558584132068   |
| ENST00000322723 | NCL-001       | 1,87E+08              | 854.793.970.086.223 | 0.00037791134091752<br>1 | 0.003099531828661   |
| ENST00000594001 | NAPA-002      | 2,24E+08              | 16.826.888.002.871  | 0.672958168645015        | 0.816131793426792   |
| ENST00000477256 | EIF3L-004     | 1,05E+08              | 798.942.149.123.906 | 0.00290507087839699      | 0.00167888652658568 |
| <b>N4</b>       |               |                       |                     |                          |                     |
| ENST00000470729 | ANKRD30BL-002 | 1,55E+08              | 505.777.326.196.031 | 0.00659460148551533      | 0.00570257155798564 |
| ENST00000000233 | ARF5-001      | 0.7261976<br>55397563 | 640.709.385.780.118 | 0.00320090465431368      | 0.00229495241934398 |
| ENST00000000412 | M6PR-001      | 0.3387391<br>38762241 | 73.293.027.976.412  | 0.00537608375025703      | 0.00147692381998447 |

|                 |                  |                       |                     |                          |                      |
|-----------------|------------------|-----------------------|---------------------|--------------------------|----------------------|
| ENST00000000442 | ESRRA-002        | 0.8819743<br>86228288 | 547.235.493.517.806 | 0.0408638097394949       | 0.00415236112393596  |
| ENST00000001008 | FKBP4-001        | 0.1910151<br>61429283 | 679.172.822.584.701 | 0.00116755705295713      | 0.00184462889382645  |
| ENST00000002125 | NDUFAF7-001      | 0.1636175<br>60646626 | 491.465.924.291.449 | 0.0365234386609319       | 0.00657682386624598  |
| ENST00000002165 | FUCA2-001        | 0.4055220<br>12220478 | 575.822.451.722.187 | 0.00289507209766224      | 0.00349588849092332  |
| ENST00000002501 | DBNDD1-001       | 0.4501271<br>85788172 | 347.617.021.615.927 | 147.595.230.611.161      | 191.613.709.241.229  |
| ENST00000002596 | HS3ST1-001       | 0.7983114<br>41419255 | 311.264.081.109.512 | 0.0443874048728591       | 0.105028605679519    |
| ENST00000003100 | CYP51A1-001      | 0.4287141<br>63922679 | 809.293.028.316.496 | 0.00052304840320551<br>7 | 0.00131580292232965  |
| <b>N5</b>       |                  |                       |                     |                          |                      |
| ENST00000392882 | WARS-001         | 3,14E+07              | 800.401.233.659.193 | 0.00431353160996303      | 0.00123752047031971  |
| ENST00000446294 | NREP-005         | 1,03E+08              | 164.933.217.379.398 | 0.556188451239202        | 0.823457598979597    |
| ENST00000347519 | CHMP4A-001       | 3,19E+08              | 177.983.366.282.996 | 0.981636180186656        | 0.709270466564632    |
| ENST00000393785 | ZBTB20-201       | 1,23E+09              | 193.097.982.845.879 | 157.056.709.734.203      | 0.59050879162828     |
| ENST00000510231 | RP11-777B9.5-001 | 1,85E+09              | 108.757.539.399.852 | 2,60E+09                 | 0.00309692109404656  |
| ENST00000604952 | MTRNR2L6-001     | 2,69E+09              | 107.426.057.317.174 | 2,21E+09                 | 0.00282152705231344  |
| ENST00000615544 | ACTG1-201        | 2,25E+09              | 755.715.375.530.782 | 0.00531289226709686      | 0.00778482630752147  |
| ENST00000617677 | EIF5B-201        | 2,53E+09              | 616.945.888.869.915 | 0.0104914153413111       | 0.00281002051684238  |
| ENST00000216727 | PABPN1-001       | 3,38E+09              | 693.806.453.661.865 | 0.00216497018385821      | 0.00178468506859369  |
| ENST00000617731 | RPS17-001        | 5,84E+09              | 941.350.810.421.702 | 0.00039007666211977<br>5 | 0.00159466503444723  |
| <b>N6</b>       |                  |                       |                     |                          |                      |
| ENST00000356476 | HIST1H3D-001     | 7,23E+01              | 820.425.804.014.341 | 0.00027351757384543<br>5 | 0.000720191172056452 |
| ENST00000399974 | MTRNR2L4-001     | 1,04E+01              | 768.890.700.250.457 | 0.00044485534124267<br>7 | 0.000818746059875927 |
| ENST00000578186 | HIST2H4A-004     | 3,85E+01              | 888.038.275.696.873 | 0.00012933191189947<br>5 | 0.000743161860666847 |

|                 |               |          |                     |                          |                      |
|-----------------|---------------|----------|---------------------|--------------------------|----------------------|
| ENST00000359611 | HIST1H2AM-001 | 3,56E+05 | 803.029.518.026.061 | 0.00029095287154794<br>3 | 0.000741440269516034 |
| ENST00000610020 | RPAP2-001     | 5,63E+05 | 814.150.051.234.126 | 0.00032033449915385      | 0.000726535405374731 |
| ENST00000555870 | MIPOL1-004    | 8,09E+05 | 791.528.689.445.217 | 0.00041790184078384<br>6 | 0.000761965696258191 |
| ENST00000398606 | GSTP1-001     | 2,08E+06 | 844.519.986.328.682 | 0.00022197501387926<br>8 | 0.000709227508241445 |
| ENST00000545075 | MTRNR2L10-001 | 1,70E+06 | 71.354.386.922.102  | 0.00079139311994241<br>3 | 0.00107045855368804  |
| ENST00000566753 | BLOC1S6-002   | 1,98E+06 | 794.064.672.515.874 | 0.00061801709517449<br>4 | 0.000756979712225691 |
| ENST00000586501 | KIAA1328-007  | 1,52E+06 | 799.467.916.243.149 | 0.00038306186773764<br>2 | 0.000747229362178993 |
