# Supplementary material
Source: PubMed Central journal article supplement (PMC6336507)
Supplement: NIHMS987816-supplement-Supp_TableS5.pdf [file NIHMS987816-supplement-Supp_TableS5.pdf]

**Supplemental Table 5** – Top 10 activated pathways upon IFN- $\gamma$  *in vitro* treatment based on p-values

| Description                                               | pValue   | Padj     | Corrected pValue | pSetRank  | setRank  | size  |
|-----------------------------------------------------------|----------|----------|------------------|-----------|----------|-------|
| <b>C1</b>                                                 |          |          |                  |           |          |       |
| Type II interferon signaling (IFNG)                       | 1,25E-15 | 7,73E-14 | 1,55E-14         | 9,19E-271 | 9,42E-02 | 45.0  |
| Targets of transcription factor IKZF1                     | 1,91E+00 | 7,73E-14 | 1,91E+00         | 6,81E-02  | 4,88E-03 | 114.0 |
| Interferon gamma signaling                                | 6,20E-08 | 7,73E-14 | 2,29E+01         | 7,41E-80  | 1,79E-02 | 57.0  |
| Cytoplasmic Ribosomal Proteins                            | 5,79E+03 | 7,73E-14 | 5,79E+03         | 1,00E+00  | 8,52E+10 | 117.0 |
| B Cell Receptor Signaling Pathway                         | 2,49E+03 | 7,73E-14 | 1,61E+04         | 1,56E-10  | 6,07E-03 | 147.0 |
| Targets of transcription factor SUZ12                     | 6,18E+05 | 7,73E-14 | 6,18E+05         | 1,00E+00  | 9,32E+10 | 217.0 |
| regulation of lymphocyte activation                       | 1,56E+04 | 7,73E-14 | 2,01E+06         | 3,22E-06  | 5,47E-03 | 241.0 |
| protection from natural killer cell mediated cytotoxicity | 2,33E+06 | 7,73E-14 | 2,33E+06         | 1,00E+00  | 6,90E+10 | 3.0   |
| Class I MHC mediated antigen processing & presentation    | 5,32E-01 | 7,73E-14 | 2,51E+07         | 1,45E-04  | 5,11E-03 | 221.0 |
| response to endoplasmic reticulum stress                  | 3,49E+05 | 7,73E-14 | 2,97E+07         | 1,00E+00  | 1,81E-03 | 126.0 |
| <b>C2</b>                                                 |          |          |                  |           |          |       |
| Type II interferon signaling (IFNG)                       | 5,09E-12 | 8,14E-11 | 5,09E-12         | 1,13E-132 | 9,09E-02 | 41.0  |
| Interferon gamma signaling                                | 8,93E-09 | 8,14E-11 | 8,41E-03         | 6,41E-58  | 3,19E-02 | 53.0  |
| HIF-1-alpha transcription factor network                  | 1,49E+01 | 8,14E-11 | 5,95E+03         | 3,13E+09  | 5,55E-03 | 40.0  |
| Cytoplasmic Ribosomal Proteins                            | 6,80E+03 | 8,14E-11 | 6,80E+03         | 1,00E+00  | 1,50E-03 | 111.0 |
| cell surface                                              | 9,83E-02 | 8,14E-11 | 8,87E+03         | 1,51E-33  | 2,03E-02 | 243.0 |
| Targets of transcription factor IKZF1                     | 5,59E+04 | 8,14E-11 | 3,90E+05         | 1,00E+00  | 2,88E-03 | 101.0 |
| Immunoproteasome                                          | 3,28E+06 | 8,14E-11 | 3,28E+06         | 1,00E+00  | 7,35E+10 | 16.0  |
| MicroRNAs in cancer                                       | 1,25E+06 | 8,14E-11 | 3,77E+06         | 1,00E+00  | 2,53E-03 | 112.0 |
| IRF8 targets                                              | 4,78E+01 | 8,14E-11 | 4,96E+06         | 2,64E-02  | 4,57E-03 | 22.0  |

|                                                |          |          |          |                             |          |       |
|------------------------------------------------|----------|----------|----------|-----------------------------|----------|-------|
| Aminoacyl-tRNA biosynthesis, eukaryotes        | 1,62E-03 | 6,67E+08 | 4,44E+07 | 1,00E+00                    | 1,40E-03 | 36.0  |
| <b>C3</b>                                      |          |          |          |                             |          |       |
| cell adhesion                                  | 2,78E+03 | 1,09E+04 | 8,38E+03 | 4,89E+07                    | 6,04E-03 | 208.0 |
| Interferon gamma signaling                     | 1,05E-04 | 1,09E+04 | 1,25E+04 | 5,87E-63                    | 3,05E-02 | 47.0  |
| ER-Phagosome pathway                           | 8,68E-03 | 1,09E+04 | 4,01E+05 | 1,78E-27                    | 1,53E-02 | 56.0  |
| Immunoproteasome                               | 7,57E+05 | 1,09E+04 | 7,57E+05 | 1,00E+00                    | 9,14E+10 | 14.0  |
| immune response-activating signal transduction | 2,87E+04 | 1,09E+04 | 2,07E+06 | 1,57E+06                    | 6,46E-03 | 197.0 |
| Type II interferon signaling (IFNG)            | 1,45E+03 | 1,09E+04 | 2,75E+06 | 1,49E-28                    | 1,67E-02 | 38.0  |
| PARP9 targets                                  | 4,12E+01 | 1,09E+04 | 2,96E+07 | 1,00E+00                    | 1,40E-03 | 13.0  |
| negative regulation of immune system process   | 3,61E+04 | 1,09E+04 | 2,99E+07 | 0.001714<br>23407155<br>791 | 4,98E-03 | 103.0 |
| IRF8 targets                                   | 2,99E+02 | 1,09E+04 | 3,93E+07 | 1,00E+00                    | 2,74E-03 | 20.0  |
| Interferon alpha/beta signaling                | 2,32E-01 | 1,09E+04 | 1,34E+08 | 4,78E-05                    | 9,41E-03 | 41.0  |
| <b>C4</b>                                      |          |          |          |                             |          |       |
| Interferon alpha/beta signaling                | 1,02E-12 | 3,83E+03 | 2,55E+03 | 7,96E-21                    | 2,86E-02 | 42.0  |
| Interferon Signaling                           | 2,12E-14 | 3,83E+03 | 2,43E+05 | 7,88E-74                    | 1,01E-01 | 130.0 |
| Immunoproteasome                               | 5,56E+05 | 3,83E+03 | 5,56E+05 | 1,00E+00                    | 1,13E-03 | 16.0  |
| Type II interferon signaling (IFNG)            | 2,86E-01 | 3,83E+03 | 2,00E+06 | 2,77E+09                    | 7,97E-03 | 40.0  |
| PARP9 targets                                  | 9,01E+01 | 3,83E+03 | 1,53E+07 | 1,00E+00                    | 1,37E-03 | 13.0  |
| Interferon gamma signaling                     | 1,41E-09 | 3,83E+03 | 2,24E+07 | 1,75E-19                    | 2,75E-02 | 52.0  |
| DTX3L targets                                  | 5,73E+03 | 3,83E+03 | 7,74E+07 | 1,00E+00                    | 1,20E-03 | 13.0  |
| Targets of transcription factor IKZF1          | 2,39E+07 | 3,83E+03 | 1,02E+08 | 1,00E+00                    | 2,07E-03 | 102.0 |
| ER-Phagosome pathway                           | 6,73E-02 | 3,83E+03 | 1,15E+08 | 1,76E-02                    | 6,31E-03 | 60.0  |
| cellular response to interferon-gamma          | 4,50E-07 | 3,83E+03 | 4,98E+08 | 4,08E-14                    | 2,31E-02 | 63.0  |

| <b>C5</b>                                    |          |          |          |           |          |       |
|----------------------------------------------|----------|----------|----------|-----------|----------|-------|
| Type II interferon signaling (IFNG)          | 1,65E-20 | 1,78E-04 | 2,54E-05 | 5,28E-231 | 6,54E-02 | 44.0  |
| Interferon alpha/beta signaling              | 8,91E-21 | 1,78E-04 | 4,24E-05 | 4,06E-100 | 2,13E-02 | 46.0  |
| Protein processing in endoplasmic reticulum  | 3,48E+00 | 1,78E-04 | 2,02E+01 | 4,79E+04  | 3,84E-03 | 150.0 |
| Interferon gamma signaling                   | 1,83E-11 | 1,78E-04 | 3,80E+02 | 4,09E-83  | 1,77E-02 | 57.0  |
| Targets of transcription factor IKZF1        | 1,16E+01 | 1,78E-04 | 1,13E+03 | 4,63E+09  | 3,27E-03 | 112.0 |
| DTX3L targets                                | 1,31E+00 | 1,78E-04 | 3,97E+03 | 1,00E+00  | 1,24E-03 | 13.0  |
| Interferon Signaling                         | 1,98E-18 | 1,78E-04 | 2,07E+04 | 1,17E-280 | 9,21E-02 | 140.0 |
| FGD2 targets                                 | 9,66E+04 | 1,78E-04 | 9,66E+04 | 1,00E+00  | 8,53E+09 | 11.0  |
| negative regulation of immune system process | 6,90E-01 | 1,78E-04 | 1,10E+05 | 1,79E-35  | 9,35E-03 | 131.0 |
| response to virus                            | 5,90E-09 | 1,78E-04 | 1,94E+05 | 5,21E-63  | 1,38E-02 | 173.0 |
| <b>D1</b>                                    |          |          |          |           |          |       |
| Systemic lupus erythematosus                 | 1,56E-22 | 8,35E-18 | 6,43E-19 | 1,41E-52  | 9,53E-02 | 86.0  |
| extracellular space                          | 1,82E-07 | 8,35E-18 | 1,51E-02 | 2,87E-21  | 4,01E-02 | 235.0 |
| Type II interferon signaling (IFNG)          | 2,47E-09 | 8,35E-18 | 1,36E+01 | 2,83E-09  | 2,60E-02 | 38.0  |
| Cytoplasmic Ribosomal Proteins               | 3,35E+02 | 8,35E-18 | 3,35E+02 | 1,00E+00  | 3,90E-03 | 108.0 |
| HIF-1-alpha transcription factor network     | 1,10E+00 | 8,35E-18 | 3,27E+05 | 1,35E+10  | 9,45E-03 | 37.0  |
| monocarboxylic acid metabolic process        | 3,25E+03 | 8,35E-18 | 4,53E+07 | 1,00E+00  | 5,22E-03 | 186.0 |
| Immunoproteasome                             | 2,64E+08 | 8,35E-18 | 2,64E+08 | 1,00E+00  | 1,35E-03 | 14.0  |
| transmembrane signaling receptor activity    | 1,45E+04 | 8,35E-18 | 4,25E+08 | 1,00E+00  | 5,93E-03 | 126.0 |
| Viral carcinogenesis                         | 2,37E-03 | 8,35E-18 | 4,45E+08 | 8,56E-13  | 2,98E-02 | 157.0 |
| N-terminal myristoylation domain binding     | 9,91E+08 | 8,35E-18 | 9,91E+08 | 1,00E+00  | 1,17E-03 | 3.0   |

| <b>D2</b>                                                 |          |          |          |                           |          |       |
|-----------------------------------------------------------|----------|----------|----------|---------------------------|----------|-------|
| Interferon gamma signaling                                | 2,75E-06 | 6,00E-01 | 1,50E-01 | 1,28E-138                 | 1,74E-02 | 54.0  |
| Cytoplasmic Ribosomal Proteins                            | 4,07E-01 | 6,00E-01 | 4,07E-01 | 1,00E+00                  | 1,37E-03 | 115.0 |
| DTX3L targets                                             | 1,22E+02 | 6,00E-01 | 1,22E+02 | 1,00E+00                  | 1,01E-03 | 13.0  |
| hematopoietic or lymphoid organ development               | 3,52E+03 | 6,00E-01 | 1,91E+04 | 3,13E-87                  | 1,11E-02 | 335.0 |
| mRNA processing                                           | 1,12E+05 | 6,00E-01 | 1,12E+05 | 1,00E+00                  | 1,68E-03 | 376.0 |
| defense response to other organism                        | 1,56E+03 | 6,00E-01 | 1,60E+05 | 4,39E-16                  | 4,60E-03 | 169.0 |
| reproductive process                                      | 2,49E+05 | 6,00E-01 | 4,25E+05 | 3,25E-40                  | 6,52E-03 | 494.0 |
| integral component of plasma membrane                     | 2,76E+02 | 6,00E-01 | 4,33E+05 | 8,49E-67                  | 9,05E-03 | 381.0 |
| Targets of transcription factor GTF3C2                    | 6,03E+07 | 6,00E-01 | 5,24E+05 | 1,00E+00                  | 6,01E+10 | 493.0 |
| cell adhesion                                             | 4,48E+02 | 6,00E-01 | 1,77E+06 | 9,09E-42                  | 6,74E-03 | 282.0 |
| <b>D3</b>                                                 |          |          |          |                           |          |       |
| Interferon alpha/beta signaling                           | 3,54E-13 | 8,16E-07 | 1,17E-06 | 1,05E-105                 | 9,47E-03 | 51.0  |
| positive regulation of immune system process              | 1,92E-09 | 8,16E-07 | 3,30E-01 | 5,01E-179                 | 1,59E-02 | 443.0 |
| Type II interferon signaling (IFNG)                       | 4,18E-06 | 8,16E-07 | 2,16E+01 | 1,67E-97                  | 8,85E-03 | 46.0  |
| modification by symbiont of host morphology or physiology | 5,10E+02 | 8,16E-07 | 4,78E+04 | 4,83E-64                  | 6,54E-03 | 306.0 |
| Direct p53 effectors                                      | 9,47E+03 | 8,16E-07 | 1,52E+05 | 0.036065<br>97010434<br>4 | 1,88E-03 | 101.0 |
| cell adhesion                                             | 2,20E+03 | 8,16E-07 | 2,07E+05 | 1,51E+03                  | 2,54E-03 | 319.0 |
| Adaptive Immune System                                    | 4,51E-02 | 8,16E-07 | 2,88E+06 | 5,04E-73                  | 7,13E-03 | 468.0 |
| Targets of transcription factor NFE2                      | 1,60E+07 | 8,16E-07 | 6,14E+06 | 1,00E+00                  | 5,59E+10 | 430.0 |
| carbohydrate derivative biosynthetic process              | 8,47E+05 | 8,16E-07 | 1,25E+07 | 1,00E+00                  | 9,17E+09 | 398.0 |

|                                                                                            |          |                             |          |                            |          |       |
|--------------------------------------------------------------------------------------------|----------|-----------------------------|----------|----------------------------|----------|-------|
| Targets of transcription factor IKZF1                                                      | 4,76E+06 | 8,16E-07                    | 2,12E+07 | 1,00E+00                   | 5,41E+10 | 113.0 |
| <b>D4</b>                                                                                  |          |                             |          |                            |          |       |
| RMTs methylate histone arginines                                                           | 3,31E-17 | 3,64E-16                    | 3,31E-17 | 0.159713<br>68592434<br>7  | 1,92E-02 | 65.0  |
| protein homodimerization activity                                                          | 1,49E+07 | 3,64E-16                    | 1,49E+07 | 0.071585<br>79650051<br>51 | 2,10E-02 | 195.0 |
| MYST3 targets                                                                              | 4,10E+08 | 3,64E-16                    | 4,10E+08 | 0.494806<br>62190737<br>7  | 1,68E-02 | 48.0  |
| mRNA splicing, via spliceosome                                                             | 2,94E+09 | 3,64E-16                    | 2,94E+09 | 1,00E+00                   | 1,03E-02 | 143.0 |
| MBNL1 targets                                                                              | 5,10E+08 | 3,64E-16                    | 3,24E+09 | 1,00E+00                   | 1,42E-02 | 85.0  |
| ZNF207 targets                                                                             | 2,94E+09 | 3,64E-16                    | 7,63E+09 | 4,55E+09                   | 3,96E-02 | 204.0 |
| tRNA processing                                                                            | 7,89E+09 | 7,89E+10                    | 7,89E+09 | 1,00E+00                   | 1,84E-03 | 30.0  |
| Pathways in cancer                                                                         | 2,65E+09 | 3,64E-16                    | 1,88E+10 | 2,07E-02                   | 2,38E-02 | 126.0 |
| Targets of transcription factor<br>POU5F1                                                  | 1,90E+10 | 0.001713<br>06783053<br>034 | 1,90E+10 | 1,00E+00                   | 2,37E-03 | 119.0 |
| UTP15 targets                                                                              | 2,66E+09 | 3,64E-16                    | 3,43E+10 | 1,00E+00                   | 6,32E-03 | 105.0 |
| <b>N1</b>                                                                                  |          |                             |          |                            |          |       |
| Chromatin organization                                                                     | 9,36E-25 | 6,27E+04                    | 4,18E+03 | 2,63E-03                   | 1,07E-01 | 119.0 |
| RNA splicing, via transesterification<br>reactions with bulged adenosine as<br>nucleophile | 4,17E+10 | 6,27E+04                    | 9,87E+07 | 1,00E+00                   | 5,44E-03 | 90.0  |
| RNA processing                                                                             | 4,93E+08 | 6,27E+04                    | 1,95E+08 | 1,00E+00                   | 2,09E-02 | 244.0 |
| HNRPD targets                                                                              | 3,79E+08 | 6,27E+04                    | 4,96E+08 | 1,00E+00                   | 2,32E-02 | 76.0  |
| Mitotic Prophase                                                                           | 1,17E-21 | 6,27E+04                    | 4,18E+09 | 2,81E+10                   | 1,46E-01 | 85.0  |
| Targets of transcription factor NFE2                                                       | 1,10E+10 | 6,27E+04                    | 1,10E+10 | 1,00E+00                   | 4,59E-03 | 159.0 |
| mitotic prophase                                                                           | 1,15E-05 | 6,27E+04                    | 1,41E+10 | 1,00E+00                   | 1,02E-02 | 41.0  |

|                                                            |          |                            |          |                           |          |       |
|------------------------------------------------------------|----------|----------------------------|----------|---------------------------|----------|-------|
| protein homodimerization activity                          | 9,53E+07 | 6,27E+04                   | 1,81E+10 | 1,00E+00                  | 1,03E-02 | 132.0 |
| spermatogenesis                                            | 6,59E+09 | 6,27E+04                   | 1,83E+10 | 1,00E+00                  | 3,80E-03 | 68.0  |
| phosphatidylinositol binding                               | 9,77E+09 | 6,27E+04                   | 3,48E+10 | 1,00E+00                  | 3,72E-03 | 44.0  |
| <b>N2</b>                                                  |          |                            |          |                           |          |       |
| NONO targets                                               | 7,07E-07 | 7,10E-06                   | 2,37E-06 | 0,00E+00                  | 5,98E-03 | 224.0 |
| Focal Adhesion                                             | 1,88E-04 | 7,10E-06                   | 9,25E-04 | 1,24E-281                 | 3,89E-03 | 178.0 |
| stem cell differentiation                                  | 8,15E-08 | 7,10E-06                   | 1,12E-03 | 0,00E+00                  | 1,43E-02 | 218.0 |
| regulation of binding                                      | 5,60E-08 | 7,10E-06                   | 5,61E-03 | 0,00E+00                  | 1,39E-02 | 199.0 |
| negative regulation of mitotic cell cycle phase transition | 6,57E-04 | 7,10E-06                   | 1,15E-02 | 1,84E-147                 | 2,11E-03 | 189.0 |
| MAPK signaling pathway                                     | 1,72E-05 | 7,10E-06                   | 2,08E-02 | 0,00E+00                  | 4,92E-03 | 235.0 |
| small GTPase binding                                       | 6,13E-03 | 7,10E-06                   | 5,27E-02 | 3,11E-13                  | 7,68E+10 | 202.0 |
| RANBP1 targets                                             | 2,63E-06 | 7,10E-06                   | 8,86E-01 | 3,01E-175                 | 2,44E-03 | 221.0 |
| post-translational protein modification                    | 3,35E-01 | 7,10E-06                   | 2,08E+00 | 1,00E+00                  | 3,17E+10 | 205.0 |
| TGF-beta Receptor Signaling Pathway                        | 6,48E-03 | 7,10E-06                   | 3,24E+00 | 8,03E-112                 | 1,72E-03 | 153.0 |
| <b>N3</b>                                                  |          |                            |          |                           |          |       |
| Cytoplasmic Ribosomal Proteins                             | 1,67E+06 | 4,14E+08                   | 2,30E+07 | 1,00E+00                  | 1,80E-02 | 99.0  |
| nucleosome organization                                    | 8,64E-05 | 4,14E+08                   | 6,06E+07 | 0.255115<br>83389306<br>1 | 5,36E-02 | 100.0 |
| protein domain specific binding                            | 2,77E+08 | 4,14E+08                   | 2,77E+08 | 1,00E+00                  | 1,22E-02 | 152.0 |
| regulation of growth hormone secretion                     | 5,93E+08 | 1,01E+09                   | 5,93E+08 | 1,00E+00                  | 3,83E-03 | 4.0   |
| Chk1 substrates                                            | 1,51E+09 | 4,14E+08                   | 1,51E+09 | 1,00E+00                  | 1,39E-02 | 69.0  |
| meiotic cell cycle                                         | 2,05E+10 | 4,14E+08                   | 5,95E+09 | 1,00E+00                  | 1,07E-02 | 35.0  |
| E2F4 targets                                               | 9,77E+10 | 0.001269<br>87892328<br>02 | 7,94E+09 | 1,00E+00                  | 1,01E-02 | 42.0  |

|                                           |                             |                            |          |          |          |       |
|-------------------------------------------|-----------------------------|----------------------------|----------|----------|----------|-------|
| mRNA processing                           | 4,91E+07                    | 4,14E+08                   | 1,38E+10 | 1,00E+00 | 2,65E-02 | 175.0 |
| NLRP1 targets                             | 0.006230<br>65023914<br>192 | 0.001269<br>87892328<br>02 | 1,53E+10 | 1,00E+00 | 5,46E-03 | 48.0  |
| RNF170 targets                            | 0.001418<br>09875155<br>092 | 0.001269<br>87892328<br>02 | 1,53E+10 | 1,00E+00 | 3,83E-03 | 23.0  |
| <b>N4</b>                                 |                             |                            |          |          |          |       |
| RMTs methylate histone arginines          | 3,31E-17                    | 3,64E-16                   | 3,31E-17 | 1,60E-01 | 1,92E-02 | 65.0  |
| protein homodimerization activity         | 1,49E+07                    | 3,64E-16                   | 1,49E+07 | 7,16E-02 | 2,10E-02 | 195.0 |
| MYST3 targets                             | 4,10E+08                    | 3,64E-16                   | 4,10E+08 | 4,95E-01 | 1,68E-02 | 48.0  |
| mRNA splicing, via spliceosome            | 2,94E+09                    | 3,64E-16                   | 2,94E+09 | 1,00E+00 | 1,03E-02 | 143.0 |
| MBNL1 targets                             | 5,10E+08                    | 3,64E-16                   | 3,24E+09 | 1,00E+00 | 1,42E-02 | 85.0  |
| ZNF207 targets                            | 2,94E+09                    | 3,64E-16                   | 7,63E+09 | 4,55E+09 | 3,96E-02 | 204.0 |
| tRNA processing                           | 7,89E+09                    | 7,89E+10                   | 7,89E+09 | 1,00E+00 | 1,84E-03 | 30.0  |
| Pathways in cancer                        | 2,65E+09                    | 3,64E-16                   | 1,88E+10 | 2,07E-02 | 2,38E-02 | 126.0 |
| Targets of transcription factor<br>POU5F1 | 1,90E+10                    | 1,71E-03                   | 1,90E+10 | 1,00E+00 | 2,37E-03 | 119.0 |
| UTP15 targets                             | 2,66E+09                    | 3,64E-16                   | 3,43E+10 | 1,00E+00 | 6,32E-03 | 105.0 |
| <b>N5</b>                                 |                             |                            |          |          |          |       |
| Chromatin organization                    | 2,58E+07                    | 3,09E+09                   | 2,58E+07 | 8,70E+02 | 3,03E-02 | 176.0 |
| CCNB1 targets                             | 9,37E+06                    | 3,09E+09                   | 1,21E+09 | 2,70E+03 | 2,91E-02 | 241.0 |
| TNF-alpha/NF-kB Signaling Pathway         | 4,80E+08                    | 3,09E+09                   | 2,00E+09 | 2,79E-02 | 1,12E-02 | 148.0 |
| RNGTT targets                             | 5,03E+08                    | 3,09E+09                   | 3,91E+09 | 9,72E+08 | 1,74E-02 | 237.0 |
| positive regulation of transport          | 4,06E+09                    | 3,09E+09                   | 6,82E+09 | 2,34E+05 | 2,48E-02 | 195.0 |
| ncRNA metabolic process                   | 1,31E+09                    | 3,09E+09                   | 6,86E+09 | 1,00E+00 | 3,79E-03 | 203.0 |
| RNA transport                             | 1,66E+09                    | 3,09E+09                   | 8,58E+09 | 1,00E+00 | 6,93E-03 | 111.0 |
| ribosomal small subunit assembly          | 3,54E-03                    | 3,09E+09                   | 1,76E+10 | 1,00E+00 | 1,31E-03 | 7.0   |

|                                                                      |          |          |          |          |          |       |
|----------------------------------------------------------------------|----------|----------|----------|----------|----------|-------|
| Targets of transcription factor PRDM1                                | 2,10E+10 | 3,09E+09 | 2,10E+10 | 1,00E+00 | 1,15E-03 | 103.0 |
| NONO targets                                                         | 3,59E+09 | 3,09E+09 | 2,15E+10 | 1,00E+00 | 8,32E-03 | 191.0 |
| <b>N6</b>                                                            |          |          |          |          |          |       |
| Cytoplasmic Ribosomal Proteins                                       | 8,76E-24 | 1,93E-22 | 8,76E-24 | 1,00E+00 | 2,16E-02 | 102.0 |
| Systemic lupus erythematosus                                         | 2,15E-29 | 1,93E-22 | 5,35E-18 | 8,80E-03 | 9,31E-02 | 82.0  |
| histone H4-K20 demethylation                                         | 4,98E-04 | 1,93E-22 | 4,98E-04 | 1,00E+00 | 3,56E-03 | 14.0  |
| NLE1 targets                                                         | 1,63E+09 | 1,93E-22 | 1,37E+09 | 1,00E+00 | 2,54E-02 | 68.0  |
| actin cytoskeleton organization                                      | 1,98E+09 | 1,93E-22 | 1,76E+09 | 1,00E+00 | 1,72E-02 | 106.0 |
| intracellular ferritin complex                                       | 4,82E+09 | 1,93E-22 | 4,82E+09 | 1,00E+00 | 3,56E-03 | 2.0   |
| HIST2H2AA3 targets                                                   | 6,18E+09 | 1,93E-22 | 6,18E+09 | 1,00E+00 | 6,58E-03 | 3.0   |
| ARID2 targets                                                        | 2,03E+10 | 1,93E-22 | 3,40E+10 | 1,00E+00 | 1,29E-02 | 50.0  |
| Telomere Maintenance                                                 | 2,35E-07 | 1,93E-22 | 4,28E+10 | 1,00E+00 | 2,28E-02 | 53.0  |
| positive regulation of transcription from RNA polymerase II promoter | 2,17E+10 | 1,93E-22 | 5,05E+10 | 1,00E+00 | 7,88E-03 | 196.0 |
